# Supplementary material for: Penalized communication-efficient algorithm for quantile regression with high-dimensional and large-scale longitudinal data
Source: Research Square preprint supplement (doi:10.21203/rs.3.rs-7635153/v1), 2025-10-03
Supplement: Supplementary file 1 [file f5993fda209b574017d4f878.pdf]

# Supplementary Material for “Penalized communication-efficient algorithm for quantile regression with high-dimensional and large-scale longitudinal data”

Yanan Song, Haohui Han, Liya Fu\*

School of Mathematics and Statistics, Xi’an Jiaotong University

This document contains supplementary material for “Penalized communication-efficient algorithm for quantile regression with high-dimensional and large-scale longitudinal data”. Section 1 provides additional definitions and technical preliminaries. Section 2 presents supporting lemmas and their proofs. Section 3 contains detailed proofs of the main results from the article.

## 1 Preliminary Definitions and Notation

We begin by establishing key notations and definitions used throughout the supplementary material. We denote the global estimating function and its derivative as

$$\mathbf{U}_M(\boldsymbol{\beta}) = \frac{1}{M} \sum_{i=1}^M \mathbf{U}_i(\boldsymbol{\beta}), \quad \mathbf{D}_M(\boldsymbol{\beta}) = \frac{1}{M} \sum_{i=1}^M \mathbf{D}_i(\boldsymbol{\beta}),$$

where for  $1 \leq i \leq M$ ,

$$\begin{aligned} \mathbf{U}_i(\boldsymbol{\beta}) &= \mathbf{x}_i^\top \mathbf{A}_i^{-1/2} \mathbf{R}_i^{-1}(\boldsymbol{\alpha}) \mathbf{A}_i^{-1/2} \left[ \mathbf{K}_h(-\boldsymbol{\epsilon}_i(\boldsymbol{\beta})) - \mathbf{1}_{n_i} \cdot \tau \right], \\ \mathbf{D}_i(\boldsymbol{\beta}) &= \frac{\partial \mathbf{U}_i(\boldsymbol{\beta})}{\partial \boldsymbol{\beta}} = \mathbf{x}_i^\top \mathbf{A}_i^{-1/2} \mathbf{R}_i^{-1}(\boldsymbol{\alpha}) \mathbf{A}_i^{-1/2} \boldsymbol{\Lambda}_i(\boldsymbol{\beta}) \mathbf{x}_i. \end{aligned}$$

For each subset  $\mathcal{I}_l$  (with  $l = 1, \dots, L$ ), we denote their local counterparts as

$$\mathbf{U}_{m,l}(\boldsymbol{\beta}) = \frac{1}{m} \sum_{i \in \mathcal{I}_l} \mathbf{U}_i(\boldsymbol{\beta}), \quad \mathbf{D}_{m,l}(\boldsymbol{\beta}) = \frac{1}{m} \sum_{i \in \mathcal{I}_l} \mathbf{D}_i(\boldsymbol{\beta}).$$

Let  $\mathbf{J}_i(\boldsymbol{\beta}) = E[\mathbf{U}_i(\boldsymbol{\beta})]$  and  $\mathbf{H}_i(\boldsymbol{\beta}) = E[\mathbf{D}_i(\boldsymbol{\beta})]$  be the expected estimating function and its derivative for the  $i$ -th subject, respectively. We define their global averages as

$$\mathbf{J}_M(\boldsymbol{\beta}) = E[\mathbf{U}_M(\boldsymbol{\beta})] = \frac{1}{M} \sum_{i=1}^M \mathbf{J}_i(\boldsymbol{\beta}), \quad \mathbf{H}_M(\boldsymbol{\beta}) = E[\mathbf{D}_M(\boldsymbol{\beta})] = \frac{1}{M} \sum_{i=1}^M \mathbf{H}_i(\boldsymbol{\beta}),$$

---

\*The authors gratefully acknowledge *National Natural Science Foundation of China (No.12371295)*

and their local averages as

$$\mathbf{J}_{m,l}(\boldsymbol{\beta}) = E[\mathbf{U}_{m,l}(\boldsymbol{\beta})] = \frac{1}{m} \sum_{i \in \mathcal{I}_l} \mathbf{J}_i(\boldsymbol{\beta}), \quad \mathbf{H}_{m,l}(\boldsymbol{\beta}) = E[\mathbf{D}_{m,l}(\boldsymbol{\beta})] = \frac{1}{m} \sum_{i \in \mathcal{I}_l} \mathbf{H}_i(\boldsymbol{\beta}).$$

We further define the centered expected estimating function as

$$\mathfrak{S}_i(\boldsymbol{\beta}) = \mathbf{J}_i(\boldsymbol{\beta}) - \mathbf{J}_i(\boldsymbol{\beta}_\tau), \quad \mathfrak{S}_M(\boldsymbol{\beta}) = \frac{1}{M} \sum_{i=1}^M \mathfrak{S}_i(\boldsymbol{\beta}).$$

Finally, we introduce the stochastic process as

$$\wp_M(\boldsymbol{\beta}) = \mathbf{U}_M(\boldsymbol{\beta}) - \mathbf{U}_M(\boldsymbol{\beta}_\tau),$$

which satisfies:

$$E[\wp_M(\boldsymbol{\beta})] = \mathbf{J}_M(\boldsymbol{\beta}) - \mathbf{J}_M(\boldsymbol{\beta}_\tau) = \mathfrak{S}_M(\boldsymbol{\beta}).$$

## 2 Technical Lemmas

This section contains technical lemmas that support the proofs of the main theorems.

**Lemma 1.** *Following He et al. (2023)[4], for  $\delta \in (0, 1]$ , define  $\iota_\delta \geq 0$  as:*

$$\iota_\delta = \inf \{ \iota > 0 : E\{\langle \mathbf{z}, \mathbf{u} \rangle^2 I(|\langle \mathbf{z}, \mathbf{u} \rangle| > \iota)\} \leq \delta \text{ for all } \mathbf{u} \in \mathbb{S}^{p-1} \}, \quad (1)$$

where  $\mathbf{z} = \boldsymbol{\Sigma}^{-1/2} \mathbf{x}$  satisfying  $E(\mathbf{z}\mathbf{z}^\top) = \mathbf{I}_{p \times p}$  and  $\mathbf{u} \in \mathbb{S}^{p-1}$  satisfying  $E\langle \mathbf{u}, \mathbf{z} \rangle^2 = 1$ . For any  $\gamma > 0$ ,  $0 < r < h_l/(4\iota_{0.25})$  and  $s \geq 0$ , there exists  $f_{l,l} \geq 0$  such that

$$\inf_{\boldsymbol{\beta} \in \mathbb{B}_{\boldsymbol{\Sigma}}(r)} \frac{\bar{D}_{\tilde{\mathcal{L}}_{M,l}}^{(s)}(\boldsymbol{\beta}, \boldsymbol{\beta}_\tau)}{\kappa_* C_m^{-1} \|\boldsymbol{\beta} - \boldsymbol{\beta}_\tau\|_{\boldsymbol{\Sigma}}^2} \geq \frac{3n_l}{4} f_{l,l} - \frac{5n_u}{4r} \sqrt{\frac{pf_{u,l}h_l}{m}} - 3n_u \sqrt{\frac{2\gamma\mu_4 f_{u,l}}{h_l m}} - \frac{13\gamma h_l n_u}{48r^2 m}$$

holds with probability at least  $1 - e^{-\gamma}$ , where  $C_m = \tau(1-\tau)\xi_{\max}$  and  $\kappa_* = \min_{|u| \leq 1} k(u) > 0$ .

*Proof.* Define the symmetrized Bregman divergence for the surrogate loss functions  $\tilde{\mathcal{L}}_{M,l}^{(s)}(\boldsymbol{\beta})$  on the  $l$ th machine at  $s$ -th iteration as

$$\begin{aligned} \bar{D}_{\tilde{\mathcal{L}}_{M,l}}^{(s)}(\boldsymbol{\beta}, \boldsymbol{\beta}_\tau) &= \left\langle \nabla \tilde{\mathcal{L}}_{M,l}^{(s)}(\boldsymbol{\beta}) - \nabla \tilde{\mathcal{L}}_{M,l}^{(s)}(\boldsymbol{\beta}_\tau), \boldsymbol{\beta} - \boldsymbol{\beta}_\tau \right\rangle \\ &= \left\langle \nabla \mathcal{L}_{m,l}^{(s)}(\boldsymbol{\beta}) - \nabla \mathcal{L}_{m,l}^{(s)}(\boldsymbol{\beta}_\tau), \boldsymbol{\beta} - \boldsymbol{\beta}_\tau \right\rangle = \bar{D}_{\mathcal{L}_{m,l}}^{(s)}(\boldsymbol{\beta}, \boldsymbol{\beta}_\tau). \end{aligned}$$

For  $\epsilon_{ik} = y_{ik} - \mathbf{x}_{ik}^\top \boldsymbol{\beta}_\tau$ ,  $i = 1, \dots, M$ ,  $k = 1, \dots, n_i$ , define the event

$$\mathcal{E}_{ik} = \left\{ |\epsilon_{ik}| \leq \frac{h_l}{2} \right\} \cap \left\{ \frac{|\langle \mathbf{x}_{ik}, \boldsymbol{\beta} - \boldsymbol{\beta}_\tau \rangle|}{\|\boldsymbol{\beta} - \boldsymbol{\beta}_\tau\|_{\boldsymbol{\Sigma}}} \leq \frac{h_l}{2r} \right\}.$$

Recall that  $\mathbb{B}_{\boldsymbol{\Sigma}}(r) = \{\boldsymbol{\beta} \in \mathbb{R}^p : \|\boldsymbol{\beta} - \boldsymbol{\beta}_\tau\|_{\boldsymbol{\Sigma}} \leq r\}$  is a local neighborhood of  $\boldsymbol{\beta}_\tau$  under  $\|\cdot\|_{\boldsymbol{\Sigma}}$ -norm. For any  $\boldsymbol{\beta} \in \mathbb{B}_{\boldsymbol{\Sigma}}(r)$ , we have  $|y_{ik} - \mathbf{x}_{ik}^\top \boldsymbol{\beta}| \leq h_l$  on  $\mathcal{E}_{ik}$ . Therefore, conditioned

on the event  $\mathcal{E}_{ik}$ , we have

$$\begin{aligned}
\bar{D}_{\mathcal{L}_{m,l}}^{(s)}(\boldsymbol{\beta}, \boldsymbol{\beta}_\tau) &= \left\langle \frac{1}{m} \sum_{i \in \mathcal{I}_l} \mathbf{x}_i^\top \mathbf{W}_i^{(s)} \mathbf{x}_i (\boldsymbol{\beta} - \boldsymbol{\beta}_\tau), \boldsymbol{\beta} - \boldsymbol{\beta}_\tau \right\rangle \\
&= \frac{1}{m} \sum_{i \in \mathcal{I}_l} (\boldsymbol{\beta} - \boldsymbol{\beta}_\tau)^\top \mathbf{x}_i^\top (\widehat{\mathbf{V}}_i^{(s)})^{-1} \boldsymbol{\Lambda}_i^{(s)} \mathbf{x}_i (\boldsymbol{\beta} - \boldsymbol{\beta}_\tau) \\
&\geq \frac{\kappa_*}{mh_l} \frac{1}{\tau(1-\tau)\xi_{\max}} \sum_{i \in \mathcal{I}_l} \sum_{k=1}^{n_i} \langle \mathbf{x}_{ik}, \boldsymbol{\beta} - \boldsymbol{\beta}_\tau \rangle^2 I(\mathcal{E}_{ik}) \\
&= \frac{\kappa_*}{mh_l} \frac{1}{\tau(1-\tau)\xi_{\max}} \sum_{i \in \mathcal{I}_l} \sum_{k=1}^{n_i} \langle \mathbf{x}_{ik}, \boldsymbol{\beta} - \boldsymbol{\beta}_\tau \rangle^2 \varsigma_{ik} I\left(|\delta_{ik,\mathbf{v}}| \leq \frac{h_l}{2r}\right)
\end{aligned}$$

for any  $\boldsymbol{\beta} \in \mathbb{B}_{\boldsymbol{\Sigma}}(r)$ , where  $\varsigma_{ik} = I(|\epsilon_{ik}| \leq h_l/2)$  and  $\delta_{ik,\mathbf{v}} = \langle \mathbf{z}_{ik}, \mathbf{v} \rangle$  with  $\mathbf{z}_{ik} = \boldsymbol{\Sigma}^{-1/2} \mathbf{x}_{ik}$ ,  $\mathbf{v} = \boldsymbol{\Sigma}^{1/2} \boldsymbol{\zeta} / \|\boldsymbol{\zeta}\|_{\boldsymbol{\Sigma}} \in \mathbb{S}^{p-1}$  and  $\boldsymbol{\zeta} = \boldsymbol{\beta} - \boldsymbol{\beta}_\tau$ . Note that  $E(\delta_{ik,\mathbf{v}}^2) = 1$ .

Following the prove of Lemma C.3 in He et al. (2023)[4], we have

$$\langle \mathbf{z}_{ik}, \mathbf{v} \rangle^2 I\left(|\langle \mathbf{z}_{ik}, \mathbf{v} \rangle| \leq \frac{h_l}{2r}\right) \geq \varphi_{h_l/(2r)}(\langle \mathbf{z}_{ik}, \mathbf{v} \rangle) \geq \langle \mathbf{z}_{ik}, \mathbf{v} \rangle^2 I\left(|\langle \mathbf{z}_{ik}, \mathbf{v} \rangle| \leq \frac{h_l}{4r}\right),$$

where  $\varphi_R(u) = u^2 I(|u| \leq R/2) + [u \operatorname{sign}(u) - R]^2 I(R/2 < |u| \leq R)$  satisfying  $u^2 I(|u| \leq R/2) \leq \varphi_R(u) \leq u^2 I(|u| \leq R)$ ,  $\varphi_0(u) = 0$ , and  $\varphi_{sR}(su) = s^2 \varphi_R(u)$  for any  $s > 0$  and  $R > 0$ . Define

$$D_0(\mathbf{v}) = \frac{1}{mh_l} \sum_{i \in \mathcal{I}_l} \sum_{k=1}^{n_i} \varsigma_{ik} \varphi_{h_l/(2r)}(\langle \mathbf{z}_{ik}, \mathbf{v} \rangle) = \frac{1}{m} \sum_{i \in \mathcal{I}_l} \sum_{k=1}^{n_i} \aleph_{ik}(\mathbf{z}_{ik}, \mathbf{v}), \quad (2)$$

where  $\aleph_{ik}(\mathbf{z}_{ik}, \mathbf{v}) = h_l^{-1} \varsigma_{ik} \varphi_{h_l/(2r)}(\langle \mathbf{z}_{ik}, \mathbf{v} \rangle)$ . At follows, we drive the lower bound of  $D_0(\mathbf{v})$  uniformly over  $\mathbf{v} \in \mathbb{S}^{p-1}$ .

According to Condition (A5), there exist some constants  $f_{u,l} \geq f_{l,l} \geq 0$  such that  $f_{l,l} \leq \min_{|u| \leq h_l/2} f_{\epsilon|\mathbf{x}}(u) \leq \max_{|u| \leq h_l/2} f_{\epsilon|\mathbf{x}}(u) \leq f_{u,l}$  almost surely (over  $\mathbf{x}$ ) as long as  $h_l$  is sufficiently small. Then, we have

$$f_{l,l} h_l \leq E(\varsigma_{ik} | \mathbf{x}_{ik}) = \int_{-h_l/2}^{h_l/2} f_{\epsilon|\mathbf{x}}(u) du \leq f_{u,l} h_l \quad (3)$$

almost surely (over  $\mathbf{x}$ ). For  $r \leq h_l/(4\iota_{1/4})$  with  $\iota_{1/4}$  defined in (1), we have

$$\begin{aligned}
E[\varsigma_{ik} \varphi_{h_l/(2r)}(\delta_{ik,\mathbf{v}})] &\geq E\left[\varsigma_{ik} \delta_{ik,\mathbf{v}}^2 I\left(|\delta_{ik,\mathbf{v}}| \leq \frac{h_l}{4r}\right)\right] \\
&\geq f_{l,l} h_l \left\{ 1 - E\left[\delta_{ik,\mathbf{v}}^2 I\left(|\delta_{ik,\mathbf{v}}| > \frac{h_l}{4r}\right)\right] \right\} \\
&\geq f_{l,l} h_l \left\{ 1 - \sup_{\mathbf{u} \in \mathbb{S}^{p-1}} E[\langle \mathbf{z}, \mathbf{u} \rangle^2 I(|\langle \mathbf{z}, \mathbf{u} \rangle| \geq \iota_{1/4})] \right\} \\
&\geq \frac{3}{4} f_{l,l} h_l.
\end{aligned} \quad (4)$$

Together with (2) and (4),

$$\inf_{\boldsymbol{\beta} \in \mathbb{B}_{\boldsymbol{\Sigma}}(r)} E[D_0(\mathbf{v})] \geq \frac{3}{4} n_l f_{l,l}. \quad (5)$$

Let  $\mathcal{N}_\varepsilon \subseteq \mathbb{S}^{p-1}$  be an  $\varepsilon$ -net of  $\mathbb{S}^{p-1}$ , which is a finite set satisfying that: for any  $\mathbf{u} \in \mathbb{S}^{p-1}$ , there exists  $\mathbf{u}' \in \mathcal{N}_\varepsilon$  such that  $\|\mathbf{u} - \mathbf{u}'\|_2 \leq \varepsilon$ . Define

$$\Pi(\mathbf{v}) = \sup_{\mathbf{v} \in \mathcal{N}_\varepsilon} \left\{ E[D_0(\mathbf{v})] - D_0(\mathbf{v}) \right\} = \sup_{\mathbf{v} \in \mathcal{N}_\varepsilon} \left\{ \frac{1}{m} \sum_{i \in \mathcal{I}_l} \sum_{k=1}^{n_i} E[\aleph_{ik}(\mathbf{z}_{ik}, \mathbf{v})] - \aleph_{ik}(\mathbf{z}_{ik}, \mathbf{v}) \right\}.$$

Next, we derive the upper bound of  $\Pi(\mathbf{v})$ .

Since  $0 \leq \varphi_R(u) \leq (R/2)^2$  for all  $u \in \mathbb{R}$ . We have  $0 \leq \aleph_{ik}(\mathbf{z}_{ik}, \mathbf{v}) \leq h_l/(4r)^2$ . For  $\varsigma_{ik} \in \{0, 1\}$ , based on (3), we have  $E[\aleph_{ik}^2(\mathbf{z}_{ik}, \mathbf{v})] \leq h_l^{-1} \mu_4 f_{u,l}$ . Define the function

$$g_i(\mathbf{z}_i, \mathbf{v}) = \frac{(4r)^2}{h_l n_u} \sum_{k=1}^{n_i} E[\aleph_{ik}(\langle \mathbf{z}_{ik}, \mathbf{v} \rangle)] - \aleph_{ik}(\langle \mathbf{z}_{ik}, \mathbf{v} \rangle),$$

where  $\mathbf{z}_i = (\mathbf{z}_{i1}, \dots, \mathbf{z}_{in_i})^T$ . Let  $\mathcal{G}$  be a countable set of functions from  $\mathcal{Z}$  to  $\mathbb{R}$ , and assume that all functions  $g_i$  ( $i \in \mathcal{I}_l$ ) in  $\mathcal{G}$  are measurable, square-integrable and satisfy  $E[g_i(\mathbf{z}_i, \mathbf{v})] = 0$ . We have  $\sup_{g_i \in \mathcal{G}} g_i \leq 1$  and

$$\begin{aligned} \sup_{g_i \in \mathcal{G}} E[g_i^2(\mathbf{z}_i, \mathbf{v})] &= \frac{(4r)^4 n_i^2}{(h_l n_u)^2} E \left\{ \frac{1}{n_i} \sum_{k=1}^{n_i} E[\aleph_{ik}(\langle \mathbf{z}_{ik}, \mathbf{v} \rangle)] - \aleph_{ik}(\langle \mathbf{z}_{ik}, \mathbf{v} \rangle) \right\}^2 \\ &\leq \frac{(4r)^4}{h_l^2} \cdot \frac{1}{n_i} \sum_{k=1}^{n_i} E \left\{ E[\aleph_{ik}(\langle \mathbf{z}_{ik}, \mathbf{v} \rangle)] - \aleph_{ik}(\langle \mathbf{z}_{ik}, \mathbf{v} \rangle) \right\}^2 \leq \frac{f_{u,l} (4r)^4 \mu_4}{h_l^3} = C_{h_l}. \end{aligned}$$

Therefore,  $\sup_{g_i \in \mathcal{G}} \sum_{i \in \mathcal{I}_l} E[g_i^2(\mathbf{z}_i, \mathbf{v})] \leq m C_{h_l}$ . Since

$$\begin{aligned} \sup_{g_i \in \mathcal{G}} \sum_{i \in \mathcal{I}_l} g_i(\mathbf{z}_i, \mathbf{v}) &= \frac{(4r)^2}{h_l n_u} \sup_{\mathbf{v} \in \mathcal{N}_\varepsilon} \sum_{i \in \mathcal{I}_l} \sum_{k=1}^{n_i} E[\aleph_{ik}(\langle \mathbf{z}_{ik}, \mathbf{v} \rangle)] - \aleph_{ik}(\langle \mathbf{z}_{ik}, \mathbf{v} \rangle) \\ &= \frac{(4r)^2 m}{h_l n_u} \sup_{\mathbf{v} \in \mathcal{N}_\varepsilon} \left\{ E[D_0(\mathbf{v})] - D_0(\mathbf{v}) \right\} = \frac{(4r)^2 m}{h_l n_u} \Pi(\mathbf{v}). \end{aligned}$$

According to a refined Talagrand's inequality in Theorem 7.3 of Bousquet (2003) [2] and the elementary inequality  $ab \leq a^2/4 + b^2$  for all  $a, b \in \mathbb{R}$ ,

$$\begin{aligned} \Pi(\mathbf{v}) &\leq E[\Pi(\mathbf{v})] + \frac{h_l n_u}{(4r)^2 m} \sqrt{2\gamma \left[ m \frac{f_{u,l} (4r)^4 \mu_4}{h_l^3} + 2 \frac{(4r)^2 m}{h_l n_u} E[\Pi(\mathbf{v})] \right]} + \frac{\gamma}{3} \frac{h_l n_u}{(4r)^2 m} \\ &\leq E[\Pi(\mathbf{v})] + n_u \sqrt{2\gamma \frac{\mu_4 f_{u,l}}{h_l m}} + \sqrt{\frac{4\gamma h_l n_u E[\Pi(\mathbf{v})]}{(4r)^2 m}} + \frac{\gamma h_l n_u}{3(4r)^2 m} \\ &\leq E[\Pi(\mathbf{v})] + n_u \sqrt{\frac{2\gamma \mu_4 f_{u,l}}{h_l m}} + \frac{1}{4} E[\Pi(\mathbf{v})] + \frac{\gamma h_l n_u}{4r^2 m} + \frac{\gamma h_l n_u}{48r^2 m} \\ &\leq \frac{5}{4} E[\Pi(\mathbf{v})] + n_u \sqrt{\frac{2\gamma \mu_4 f_{u,l}}{h_l m}} + \frac{13\gamma h_l n_u}{48r^2 m} \end{aligned} \tag{6}$$

holds with probability at least  $1 - e^{-\gamma}$  for any  $\gamma > 0$ .

Now, we derive the upper bound of  $E[\Pi(\mathbf{v})]$ . Since  $\varsigma_{ik} = I(|\epsilon_{ik}| \leq h_l/2) \in \{0, 1\}$ , we have  $\varsigma_{ik} \varphi_{h_l/(2r)}(\delta_{ik}, \mathbf{v}) = \varsigma_{ik}^2 \varphi_{h_l/(2r)}(\delta_{ik}, \mathbf{v}) = \varphi_{\varsigma_{ik} h_l/(2r)}(\varsigma_{ik} \delta_{ik}, \mathbf{v}) = \varphi_{h_l/(2r)}(\varsigma_{ik} \delta_{ik}, \mathbf{v})$ . Write

$\aleph_{ik}(\bar{\mathbf{z}}_{ik}, \mathbf{v}) = h_l^{-1} \varphi_{h_l/(2r)}(\langle \bar{\mathbf{z}}_{ik}, \mathbf{v} \rangle)$  with  $\bar{\mathbf{z}}_{ik} = \varsigma_{ik} \mathbf{z}_{ik}$ . Since  $\varphi_R(\cdot)$  is  $R$ -Lipschitz continuous,  $h^{-1} \varphi_{h_l/(2r)}(\bar{\mathbf{z}}_{ik}, \mathbf{v})$  is  $(2r)^{-1}$ -Lipschitz continuous, that is, for any  $\mathbf{v}, \mathbf{v}' \in \mathbb{R}^p$ ,

$$\frac{1}{h_l} \left| \varphi_{h_l/(2r)}(\langle \bar{\mathbf{z}}_{ik}, \mathbf{v} \rangle) - \varphi_{h_l/(2r)}(\langle \bar{\mathbf{z}}_{ik}, \mathbf{v}' \rangle) \right| \leq \frac{1}{2r} \left| \langle \bar{\mathbf{z}}_{ik}, \mathbf{v} \rangle - \langle \bar{\mathbf{z}}_{ik}, \mathbf{v}' \rangle \right|. \quad (7)$$

Moreover, for any  $\mathbf{v}$  such that  $\langle \bar{\mathbf{z}}_{ik}, \mathbf{v} \rangle = 0$ , we have  $\aleph_{ik}(\bar{\mathbf{z}}_{ik}, \mathbf{v}) = 0$ .

Suppose that  $Z_1, \dots, Z_m$  are  $m$  independent Rademacher random variables. According to Rademacher symmetrization, we have

$$E[\Pi(\mathbf{v})] \leq 2E \left[ \sup_{\mathbf{v} \in \mathcal{N}_\varepsilon} \left( \frac{1}{m} \sum_{i \in \mathcal{I}_l} Z_i \aleph_i(\langle \bar{\mathbf{z}}_i, \mathbf{v} \rangle) \right) \right], \quad (8)$$

where  $\aleph_i(\langle \bar{\mathbf{z}}_i, \mathbf{v} \rangle) = \sum_{k=1}^{n_i} \aleph_{ik}(\langle \bar{\mathbf{z}}_{ik}, \mathbf{v} \rangle)$  and  $\bar{\mathbf{z}}_i = (\bar{\mathbf{z}}_{i1}, \dots, \bar{\mathbf{z}}_{in_i})^T$ . Define the subset  $\mathcal{V}_l \subseteq \mathbb{R}^{N_l}$  ( $N_l = \sum_{i \in \mathcal{I}_l} n_i$ ) as

$$\mathcal{V}_l = \{ \boldsymbol{\nu} = (\boldsymbol{\nu}_1^T, \dots, \boldsymbol{\nu}_m^T)^T, \boldsymbol{\nu}_i = (\nu_{i1}, \dots, \nu_{in_i})^T : \nu_{ik} = \langle \bar{\mathbf{z}}_{ik}, \mathbf{v} \rangle, i = 1, \dots, m, k = 1, \dots, n_i, \mathbf{v} \in \mathcal{N}_\varepsilon \}.$$

Let  $\phi_{ik}(\nu_{ik}) = (2r/h_l) \cdot \varphi_{h_l/(2r)}(\nu_{ik})$ . Then,  $\phi_{ik}$  is a convex function on its segment value ranges and  $\aleph_{ik}(\langle \bar{\mathbf{z}}_{ik}, \mathbf{v} \rangle) = h_l^{-1} \varphi_{h_l/(2r)}(\nu_{ik}) = (1/2r) \phi_{ik}(\nu_{ik})$ . Based on (7), we have  $|\phi(\nu) - \phi(\nu')| \leq |\nu - \nu'|$  for  $\nu, \nu' \in \mathbb{R}$ . According to the Talagrand's contraction principle (4.20) of Theorem 4.12 in Ledoux and Talagrand (1991) [5],

$$\begin{aligned} 2E \left[ \sup_{\mathbf{v} \in \mathcal{N}_\varepsilon} \left( \frac{1}{m} \sum_{i \in \mathcal{I}_l} Z_i \aleph_i(\langle \bar{\mathbf{z}}_i, \mathbf{v} \rangle) \right) \right] &\leq \frac{1}{r} E \left\{ \sup_{\boldsymbol{\nu} \in \mathcal{V}_l} \left[ \frac{1}{m} \sum_{i \in \mathcal{I}_l} Z_i \left( \sum_{k=1}^{n_i} \phi_{ik}(\nu_{ik}) \right) \right] \right\} \\ &\leq \frac{1}{r} E \left\{ \sup_{\boldsymbol{\nu} \in \mathcal{V}_l} \left[ \frac{1}{m} \sum_{i \in \mathcal{I}_l} Z_i \left( \sum_{k=1}^{n_i} \nu_{ik} \right) \right] \right\} \\ &= \frac{1}{r} E \left\{ \sup_{\mathbf{v} \in \mathcal{N}_\varepsilon} \left[ \frac{1}{m} \sum_{i \in \mathcal{I}_l} Z_i \left( \sum_{k=1}^{n_i} \langle \bar{\mathbf{z}}_{ik}, \mathbf{v} \rangle \right) \right] \right\} \\ &\leq \frac{1}{r} E \left\| \frac{1}{m} \sum_{i \in \mathcal{I}_l} Z_i \left( \sum_{k=1}^{n_i} \varsigma_{ik} \mathbf{z}_{ik} \right) \right\|_2. \end{aligned} \quad (9)$$

Let  $\hbar_j = m^{-1} \sum_{i \in \mathcal{I}_l} Z_i \sum_{k=1}^{n_i} \varsigma_{ik} z_{ik,j}$ . Note that  $E(Z_i \sum_{k=1}^{n_i} \varsigma_{ik} z_{ik,j}) = 0$ . Based on (3),

$$\begin{aligned} E(\hbar_j^2) &= E \left[ \frac{1}{m} \sum_{i \in \mathcal{I}_l} Z_i \left( \sum_{k=1}^{n_i} \varsigma_{ik} z_{ik,j} \right) \right]^2 = \frac{1}{m^2} \sum_{i \in \mathcal{I}_l} E \left[ Z_i^2 n_i^2 \left( \frac{1}{n_i} \sum_{k=1}^{n_i} \varsigma_{ik} z_{ik,j} \right)^2 \right] \\ &\leq \frac{1}{m^2} \sum_{i \in \mathcal{I}_l} n_i \sum_{k=1}^{n_i} E[(\varsigma_{ik} z_{ik,j})^2] \leq \frac{f_{u,l} h_l n_u^2}{m} \end{aligned}$$

for  $j = 1, \dots, p$ . Then,

$$E \left\| \frac{1}{m} \sum_{i \in \mathcal{I}_l} Z_i \left( \sum_{k=1}^{n_i} \varsigma_{ik} \mathbf{z}_{ik} \right) \right\|_2 \leq \sqrt{\sum_{j=1}^p E(\hbar_j^2)} \leq n_u \sqrt{\frac{p f_{u,l} h_l}{m}}. \quad (10)$$

Together with (6) and (8)–(10),

$$\sup_{\mathbf{v} \in \mathcal{N}_\varepsilon} \left\{ E[D_0(\mathbf{v})] - D_0(\mathbf{v}) \right\} \leq \frac{5n_u}{4r} \sqrt{\frac{pf_{u,l}h_l}{m}} + n_u \sqrt{\frac{2\gamma\mu_4 f_{u,l}}{h_l m}} + \frac{13\gamma h_l n_u}{48r^2 m} \quad (11)$$

holds with probability at least  $1 - e^{-\gamma}$ . Since for any  $\mathbf{v} \in \mathbb{S}^{p-1}$ , there exists  $\mathbf{v}' \in \mathcal{N}_\varepsilon$  such that

$$\begin{aligned} & \sup_{\mathbf{v} \in \mathbb{S}^{p-1}} \left\{ E[D_0(\mathbf{v})] - D_0(\mathbf{v}) \right\} \\ &= \sup_{\mathbf{v} \in \mathbb{S}^{p-1}, \mathbf{v}' \in \mathcal{N}_\varepsilon} \left\{ E[D_0(\mathbf{v}')] - D_0(\mathbf{v}') + E[D_0(\mathbf{v})] - E[D_0(\mathbf{v}')] + D_0(\mathbf{v}') - D_0(\mathbf{v}) \right\} \\ &\leq \sup_{\mathbf{v}' \in \mathcal{N}_\varepsilon} \left\{ E[D_0(\mathbf{v}')] - D_0(\mathbf{v}') \right\} \end{aligned} \quad (12)$$

as  $\varepsilon \rightarrow 0$ . Together with (5), (11) and (12),

$$\begin{aligned} \inf_{\mathbf{v} \in \mathbb{S}^{p-1}} D_0(\mathbf{v}) &= \inf_{\mathbf{v} \in \mathbb{S}^{p-1}} \left\{ D_0(\mathbf{v}) - E[D_0(\mathbf{v})] + E[D_0(\mathbf{v})] \right\} \\ &\geq \inf_{\mathbf{v} \in \mathbb{S}^{p-1}} E[D_0(\mathbf{v})] + \inf_{\mathbf{v} \in \mathbb{S}^{p-1}} \left\{ D_0(\mathbf{v}) - E[D_0(\mathbf{v})] \right\} \\ &= \inf_{\mathbf{v} \in \mathbb{S}^{p-1}} E[D_0(\mathbf{v})] - \sup_{\mathbf{v} \in \mathbb{S}^{p-1}} \left\{ -D_0(\mathbf{v}) + E[D_0(\mathbf{v})] \right\} \\ &\geq \frac{3n_l}{4} f_{l,l} - \frac{5n_u}{4r} \sqrt{\frac{pf_{u,l}h_l}{m}} - n_u \sqrt{\frac{2\gamma\mu_4 f_{u,l}}{h_l m}} - \frac{13\gamma h_l n_u}{48r^2 m} \end{aligned}$$

holds with probability at least  $1 - e^{-\gamma}$ . Consequently,

$$\begin{aligned} \inf_{\boldsymbol{\beta} \in \mathbb{B}_{\Sigma}(r)} \bar{D}_{\mathcal{L}_{m,l}}^{(s)}(\boldsymbol{\beta}, \boldsymbol{\beta}_\tau) &\geq \frac{\kappa_* \|\boldsymbol{\zeta}\|_{\Sigma}^2}{\tau(1-\tau)\xi_{\max}} \inf_{\mathbf{v} \in \mathbb{S}^{p-1}} D_0(\mathbf{v}) \\ &\geq \frac{\kappa_* \|\boldsymbol{\zeta}\|_{\Sigma}^2}{\tau(1-\tau)\xi_{\max}} \left( \frac{3n_l}{4} f_{l,l} - \frac{5n_u}{4r} \sqrt{\frac{pf_{u,l}h_l}{m}} - 3n_u \sqrt{\frac{2\gamma\mu_4 f_{u,l}}{h_l m}} - \frac{13\gamma h_l n_u}{48r^2 m} \right). \end{aligned}$$

■

**Lemma 2.** *Given an estimator  $\hat{\boldsymbol{\beta}}$  of  $\boldsymbol{\beta}$ , denote  $\hat{\mathbf{R}}_i$  as the estimator of  $\mathbf{R}_i = \mathbf{R}_i(\boldsymbol{\alpha})$  based on  $\hat{\boldsymbol{\beta}}$ . Let  $\bar{\tau} = \max(1 - \tau, \tau)$ . Under Conditions (A1)–(A4), for any  $\varepsilon > 0$ , there exist constants  $C_\varepsilon, M_0 > 0$  such that for every  $M \geq M_0$ , the following hold simultaneously with probability at least  $1 - \varepsilon$ :*

(i)

$$\left\| \hat{\mathbf{U}}_M(\boldsymbol{\beta}) - \mathbf{U}_M(\boldsymbol{\beta}) \right\|_\infty \leq C_0 C_\varepsilon \sqrt{\frac{p}{M}},$$

where  $C_0 = (1 - \bar{\tau})^{-1} n_u B$  is independent of  $M$  and  $p$ .

(ii)

$$\left\| \mathfrak{G}_M(\boldsymbol{\beta}) \right\|_2 = \left\| \Sigma^{-1/2} \left\{ \hat{\mathbf{U}}_M(\boldsymbol{\beta}) - \mathbf{U}_M(\boldsymbol{\beta}) \right\} \right\|_2 \leq \xi_p^{-1/2} C_0 C_\varepsilon \frac{p}{\sqrt{M}},$$

where  $\xi_p > 0$  is the smallest eigenvalue of  $\Sigma = E(\mathbf{x}\mathbf{x}^T)$ .

*Proof.* Under Conditions (A1)–(A4), with probability at least  $1 - \varepsilon$ :

$$\begin{aligned}
\mathfrak{U}_M &= \left\| \widehat{\mathbf{U}}_M(\boldsymbol{\beta}) - \mathbf{U}_M(\boldsymbol{\beta}) \right\|_\infty \\
&= \max_{1 \leq j \leq p} \left| \frac{1}{M} \sum_{i=1}^M \mathbf{x}_{i,j}^\top \mathbf{A}_i^{-1/2} \left( \widehat{\mathbf{R}}_i^{-1} - \mathbf{R}_i^{-1} \right) \mathbf{A}_i^{-1/2} \left[ \mathbf{K}_h(-\boldsymbol{\epsilon}_i(\boldsymbol{\beta})) - \mathbf{1}_{n_i} \cdot \tau \right] \right| \\
&\leq \max_{1 \leq j \leq p} \frac{1}{M} \sum_{i=1}^M \|\mathbf{x}_{i,j}\|_2 \cdot \left\| \mathbf{A}_i^{-1/2} \left( \widehat{\mathbf{R}}_i^{-1} - \mathbf{R}_i^{-1} \right) \mathbf{A}_i^{-1/2} \right\|_2 \cdot \left\| \mathbf{K} \left( -\frac{\mathbf{y}_i - \mathbf{x}_i^\top \boldsymbol{\beta}}{h} \right) - \mathbf{1}_{n_i} \cdot \tau \right\|_2 \\
&\leq \frac{1}{\tau(1-\tau)} \cdot \frac{1}{M} \sum_{i=1}^M \|\mathbf{x}_{i,j}\|_2 \cdot \left\| \widehat{\mathbf{R}}_i^{-1} - \mathbf{R}_i^{-1} \right\|_2 \cdot \sqrt{n_u} \max_{i,k} \left| K \left( -\frac{y_{ik} - \mathbf{x}_{ik}^\top \boldsymbol{\beta}}{h} \right) - \tau \right| \\
&\leq \frac{1}{\tau(1-\tau)} \cdot \frac{1}{M} \sum_{i=1}^M \sqrt{n_u} \max_{i,k,j} |x_{ik,j}| \cdot C_\varepsilon \sqrt{\frac{p}{M}} \cdot \sqrt{n_u} \cdot \bar{\tau} \\
&\leq (1 - \bar{\tau})^{-1} n_u B C_\varepsilon \sqrt{\frac{p}{M}} = C_0 C_\varepsilon \sqrt{\frac{p}{M}},
\end{aligned}$$

where the identity  $\tau^{-1}(1-\tau)^{-1}\bar{\tau} = (1-\bar{\tau})^{-1}$  follows from the definition of  $\bar{\tau}$ . With the same probability, we have

$$\begin{aligned}
\|\mathfrak{S}_M(\boldsymbol{\beta})\|_2 &= \left\| \boldsymbol{\Sigma}^{-1/2} \left( \widehat{\mathbf{U}}_M(\boldsymbol{\beta}) - \mathbf{U}_M(\boldsymbol{\beta}) \right) \right\|_2 \leq \xi_p^{-1/2} \left\| \widehat{\mathbf{U}}_M(\boldsymbol{\beta}) - \mathbf{U}_M(\boldsymbol{\beta}) \right\|_2 \\
&\leq \xi_p^{-1/2} \sqrt{p} \left\| \widehat{\mathbf{U}}_M(\boldsymbol{\beta}) - \mathbf{U}_M(\boldsymbol{\beta}) \right\|_\infty \leq \xi_p^{-1/2} C_0 C_\varepsilon \sqrt{\frac{p^2}{M}}.
\end{aligned}$$

■

**Lemma 3.** Assume that Conditions (A2)–(A7) hold. For any  $\gamma > 0$ , as long as  $h \gtrsim \sqrt{(p+\gamma)/M}$ ,

$$\begin{aligned}
\sup_{\boldsymbol{\beta} \in \mathbb{B}_{\boldsymbol{\Sigma}}(r)} \|\Delta_M(\boldsymbol{\beta})\|_2 &= \sup_{\boldsymbol{\beta} \in \mathbb{B}_{\boldsymbol{\Sigma}}(r)} \left\| \boldsymbol{\Sigma}^{-1/2} \left\{ \mathbf{U}_M(\boldsymbol{\beta}) - \mathbf{U}_M(\boldsymbol{\beta}_\tau) - \mathbf{H}_M(\boldsymbol{\beta}_\tau)(\boldsymbol{\beta} - \boldsymbol{\beta}_\tau) \right\} \right\|_2 \\
&\lesssim C_1 r \left( \sqrt{\frac{p+\gamma}{Mh}} + r \right)
\end{aligned}$$

holds with probability at least  $1 - e^{-\gamma}$ , where  $C_1 > 0$  is a constant depending on  $(\tau, L_0, n_u, f_u, \kappa_u, a_1, \mu_3, \xi_{\min})$ .

*Proof.* Similar to the proof of Proposition S5 in Song et al. (2024) [6], we just need to derive the upper bound of

$$\sup_{\boldsymbol{\beta} \in \mathbb{B}_{\boldsymbol{\Sigma}}(r)} \|\Delta_M(\boldsymbol{\beta})\|_2 \leq \sup_{\boldsymbol{\beta} \in \mathbb{B}_{\boldsymbol{\Sigma}}(r)} \left\| E[\Delta_M(\boldsymbol{\beta})] \right\|_2 + \sup_{\boldsymbol{\beta} \in \mathbb{B}_{\boldsymbol{\Sigma}}(r)} \left\| \Delta_M(\boldsymbol{\beta}) - E[\Delta_M(\boldsymbol{\beta})] \right\|_2. \quad (13)$$

According to the mean-value theorem of vector-valued functions, for  $\boldsymbol{\zeta} = \boldsymbol{\beta} - \boldsymbol{\beta}_\tau$  with  $\boldsymbol{\beta} \in \mathbb{B}_{\boldsymbol{\Sigma}}(r)$ ,

$$\begin{aligned}
E[\Delta_M(\boldsymbol{\beta})] &= \boldsymbol{\Sigma}^{-1/2} \left\langle \int_0^1 \mathbf{H}_M(\boldsymbol{\beta}_\tau + t\boldsymbol{\zeta}) dt, \boldsymbol{\zeta} \right\rangle - \boldsymbol{\Sigma}^{-1/2} \mathbf{H}_M(\boldsymbol{\beta}_\tau) \cdot \boldsymbol{\zeta} \\
&= \left\langle \boldsymbol{\Sigma}^{-1/2} \int_0^1 \mathbf{H}_M(\boldsymbol{\beta}_\tau + t\boldsymbol{\zeta}) dt \cdot \boldsymbol{\Sigma}^{-1/2} - \boldsymbol{\Sigma}^{-1/2} \mathbf{H}_M(\boldsymbol{\beta}_\tau) \cdot \boldsymbol{\Sigma}^{-1/2}, \boldsymbol{\Sigma}^{1/2} \boldsymbol{\zeta} \right\rangle.
\end{aligned} \quad (14)$$

Denote  $\mathbf{z}_i = \mathbf{x}_i \Sigma^{-1/2}$  and  $\boldsymbol{\delta} = \Sigma^{1/2} \boldsymbol{\zeta}$ , we have

$$\Sigma^{-1/2} \mathbf{H}_M(\boldsymbol{\beta}_\tau) \cdot \Sigma^{-1/2} = \frac{1}{M} \sum_{i=1}^M E \left\{ \mathbf{z}_i^T \mathbf{A}_i^{-1/2} \mathbf{R}_i^{-1} \mathbf{A}_i^{-1/2} \boldsymbol{\Lambda}_i(\boldsymbol{\beta}_\tau) \mathbf{z}_i \right\}. \quad (15)$$

Since for  $\mathbf{z}_{ik}$  ( $1 \leq i \leq M$ ,  $1 \leq k \leq n_i$ ),

$$\begin{aligned} E \left\{ \mathbf{z}_{ik} \Lambda_{ik}(\boldsymbol{\beta}_\tau + t\boldsymbol{\zeta}) \mathbf{z}_{ik}^T \right\} &= \frac{1}{h} E \left\{ k \left( \frac{\mathbf{z}_{ik}^T \boldsymbol{\delta} \cdot t - \epsilon_{ik}}{h} \right) \cdot \mathbf{z}_{ik} \mathbf{z}_{ik}^T \right\} \\ &= E \left[ \int_{-\infty}^{+\infty} k(u) f_{\epsilon|\mathbf{x}}(\mathbf{z}^T \boldsymbol{\delta} \cdot t - hu) du \cdot \mathbf{z} \mathbf{z}^T \right], \end{aligned} \quad (16)$$

where  $\Lambda_{ik}(\cdot)$  is the  $k$ th diagonal element of  $\boldsymbol{\Lambda}_i(\cdot)$  and  $\mathbf{z} = \Sigma^{-1/2} \mathbf{x}$ . According to (15) and (16), For  $\boldsymbol{\delta}$  which satisfies  $\|\boldsymbol{\delta}\|_2 \leq r$ ,

$$\begin{aligned} &\left\| \Sigma^{-1/2} \mathbf{H}_M(\boldsymbol{\beta}_\tau + t\boldsymbol{\zeta}) \cdot \Sigma^{-1/2} - \Sigma^{-1/2} \mathbf{H}_M(\boldsymbol{\beta}_\tau) \cdot \Sigma^{-1/2} \right\|_2 \\ &= \left\| \frac{1}{M} \sum_{i=1}^M E \left\{ \mathbf{z}_i^T \mathbf{A}_i^{-1/2} \mathbf{R}_i^{-1} \mathbf{A}_i^{-1/2} [\boldsymbol{\Lambda}_i(\boldsymbol{\beta}_\tau + t\boldsymbol{\zeta}) - \boldsymbol{\Lambda}_i(\boldsymbol{\beta}_\tau)] \mathbf{z}_i \right\} \right\|_2 \\ &\leq \frac{1}{\tau(1-\tau)\xi_{\min}} \left\| \frac{1}{M} \sum_{i=1}^M \sum_{k=1}^{n_i} E \left\{ \mathbf{z}_{ik} [\Lambda_{ik}(\boldsymbol{\beta}_\tau + t\boldsymbol{\zeta}) - \Lambda_{ik}(\boldsymbol{\beta}_\tau)] \mathbf{z}_{ik}^T \right\} \right\|_2 \\ &\leq \frac{n_u}{\tau(1-\tau)\xi_{\min}} E \left\| \int_{-\infty}^{+\infty} k(u) [f_{\epsilon|\mathbf{x}}(\mathbf{z}^T \boldsymbol{\delta} \cdot t - hu) - f_{\epsilon|\mathbf{x}}(-hu)] du \cdot \mathbf{z} \mathbf{z}^T \right\|_2 \\ &\leq \frac{n_u L_0 t}{C_r} \sup_{\|\mathbf{u}\|_2=1} \left\{ E(\langle \mathbf{z}, \mathbf{u} \rangle^2 | \langle \mathbf{z}, \mathbf{v} \rangle) \right\} \cdot \|\boldsymbol{\delta}\|_2 \\ &\leq \frac{n_u \mu_3 L_0 r t}{C_r}, \end{aligned} \quad (17)$$

where  $C_r = \tau(1-\tau)\xi_{\min}$ . Together with (14) and (17),

$$\sup_{\boldsymbol{\beta} \in \mathbb{B}_{\Sigma}(r)} \left\| E[\Delta_M(\boldsymbol{\beta})] \right\|_2 \leq 0.5 C_r^{-1} L_0 n_u \mu_3 r^2. \quad (18)$$

At follows, we derive the upper bound of  $\sup_{\boldsymbol{\beta} \in \mathbb{B}_{\Sigma}(r)} \|\Delta_M(\boldsymbol{\beta}) - E[\Delta_M(\boldsymbol{\beta})]\|_2$ . Define the centralized gradient process

$$\Psi_M(\boldsymbol{\beta}) = \Sigma^{-1/2} [\mathbf{U}_M(\boldsymbol{\beta}) - \mathbf{J}_M(\boldsymbol{\beta})]$$

such that  $\Delta_M(\boldsymbol{\beta}) - E[\Delta_M(\boldsymbol{\beta})] = \Psi_M(\boldsymbol{\beta}) - \Psi_M(\boldsymbol{\beta}_\tau)$ . For  $\boldsymbol{\delta}$  which satisfies  $\|\boldsymbol{\delta}\|_2 \leq r$ ,

$$\begin{aligned} \sup_{\boldsymbol{\beta} \in \mathbb{B}_{\Sigma}(r)} \left\| \Delta_M(\boldsymbol{\beta}) - E[\Delta_M(\boldsymbol{\beta})] \right\|_2 &= \sup_{\boldsymbol{\beta} \in \mathbb{B}_{\Sigma}(r)} \left\| \Psi_M(\boldsymbol{\beta}) - \Psi_M(\boldsymbol{\beta}_\tau) \right\|_2 \\ &= \sup_{\|\boldsymbol{\delta}\|_2 \leq r} \left\| \Psi_M(\boldsymbol{\beta}_\tau + \Sigma^{-1/2} \boldsymbol{\delta}) - \Psi_M(\boldsymbol{\beta}_\tau) \right\|_2. \end{aligned}$$

Let  $\Delta_{M,0}(\boldsymbol{\delta}) = \Psi_M(\boldsymbol{\beta}_\tau + \Sigma^{-1/2} \boldsymbol{\delta}) - \Psi_M(\boldsymbol{\beta}_\tau)$ , then  $\Delta_{M,0}(\mathbf{0}) = \mathbf{0}$  and  $E[\Delta_{M,0}(\boldsymbol{\delta})] = \mathbf{0}$ . We now drive the upper bound of  $\sup_{\|\boldsymbol{\delta}\|_2 \leq r} \Delta_{M,0}(\boldsymbol{\delta})$  based on Theorem A.3 in Spokoiny



(2012) [7]. Take the first-order derivative of  $\Delta_{M,0}(\boldsymbol{\delta})$  with respect to  $\boldsymbol{\delta}$ , we have

$$\begin{aligned}
\nabla \Delta_{M,0}(\boldsymbol{\delta}) &= \boldsymbol{\Sigma}^{-1/2} \left[ \mathbf{D}_M(\boldsymbol{\beta}_\tau + \boldsymbol{\Sigma}^{-1/2} \boldsymbol{\delta}) - \mathbf{H}_M(\boldsymbol{\beta}_\tau + \boldsymbol{\Sigma}^{-1/2} \boldsymbol{\delta}) \right] \cdot \boldsymbol{\Sigma}^{-1/2} \\
&\leq \frac{1}{C_r} \frac{1}{M} \sum_{i=1}^M \left\{ \mathbf{z}_i^T \boldsymbol{\Lambda}_i(\boldsymbol{\beta}_\tau + \boldsymbol{\Sigma}^{-1/2} \boldsymbol{\delta}) \mathbf{z}_i - E[\mathbf{z}_i^T \boldsymbol{\Lambda}_i(\boldsymbol{\beta}_\tau + \boldsymbol{\Sigma}^{-1/2} \boldsymbol{\delta}) \mathbf{z}_i] \right\} \\
&= \frac{1}{C_r} \frac{1}{M} \sum_{i=1}^M \sum_{k=1}^{n_i} \left\{ \mathbf{z}_{ik} \boldsymbol{\Lambda}_{ik}(\boldsymbol{\beta}_\tau + \boldsymbol{\Sigma}^{-1/2} \boldsymbol{\delta}) \mathbf{z}_{ik}^T - E[\mathbf{z}_{ik} \boldsymbol{\Lambda}_{ik}(\boldsymbol{\beta}_\tau + \boldsymbol{\Sigma}^{-1/2} \boldsymbol{\delta}) \mathbf{z}_{ik}^T] \right\} \\
&= \frac{1}{C_r} \frac{1}{M} \sum_{i=1}^M \sum_{k=1}^{n_i} \left\{ k_h(\mathbf{z}_{ik}^T \boldsymbol{\delta} - \epsilon_{ik}) \mathbf{z}_{ik} \mathbf{z}_{ik}^T - E[k_h(\mathbf{z}_{ik}^T \boldsymbol{\delta} - \epsilon_{ik}) \mathbf{z}_{ik} \mathbf{z}_{ik}^T] \right\},
\end{aligned}$$

where  $k_h(\cdot) = (1/h)k(\cdot)$ . Write  $k_{ik,\delta} = k_h(\mathbf{z}_{ik}^T \boldsymbol{\delta} - \epsilon_{ik})$ , then  $0 \leq k_{ik,\delta} \leq \kappa_u/h$ . According to the proof of Proposition S5 in the supplementary of Song et al. (2024) [6] and the elementary inequality  $|e^u - 1 - u| \leq u^2 e^{|u|}/2$ , for any  $\mathbf{u}, \mathbf{u}' \in \mathbb{S}^{p-1}$  and  $\lambda \in \mathbb{R}$ ,

$$\begin{aligned}
&E \left[ \exp \left\{ \lambda \sqrt{M} \langle \mathbf{u}, \nabla \Delta_{M,0}(\boldsymbol{\delta}) \mathbf{u}' \rangle / a_1^2 \right\} \right] \\
&\leq E \left[ \exp \left\{ \frac{\lambda \sqrt{M}}{a_1^2 C_r} \left\langle \mathbf{u}, \frac{1}{M} \sum_{i=1}^M \sum_{k=1}^{n_i} \left\{ k_{ik,\delta} \mathbf{z}_{ik} \mathbf{z}_{ik}^T - E(k_{ik,\delta} \mathbf{z}_{ik} \mathbf{z}_{ik}^T) \right\} \mathbf{u}' \right\rangle \right\} \right] \\
&= \prod_{i=1}^M E \left[ \exp \left\{ \frac{\lambda \sqrt{M}}{a_1^2 C_r M} \sum_{k=1}^{n_i} \left\langle \mathbf{u}, \left\{ k_{ik,\delta} \mathbf{z}_{ik} \mathbf{z}_{ik}^T - E(k_{ik,\delta} \mathbf{z}_{ik} \mathbf{z}_{ik}^T) \right\} \mathbf{u}' \right\rangle \right\} \right] \\
&\leq \prod_{i=1}^M \left\{ 1 + E \left[ \frac{\lambda \sqrt{M}}{a_1^2 C_r M} \sum_{k=1}^{n_i} \left\langle \mathbf{u}, \left\{ k_{ik,\delta} \mathbf{z}_{ik} \mathbf{z}_{ik}^T - E(k_{ik,\delta} \mathbf{z}_{ik} \mathbf{z}_{ik}^T) \right\} \mathbf{u}' \right\rangle \right] \right. \\
&\quad \left. + \frac{\lambda^2 M}{2a_1^4 C_r^2 M^2} E \left[ \left( \sum_{k=1}^{n_i} \left\langle \mathbf{u}, \left\{ k_{ik,\delta} \mathbf{z}_{ik} \mathbf{z}_{ik}^T - E(k_{ik,\delta} \mathbf{z}_{ik} \mathbf{z}_{ik}^T) \right\} \mathbf{u}' \right\rangle \right)^2 \right] \right. \\
&\quad \left. \times \exp \left\{ \left| \frac{\lambda \sqrt{M}}{a_1^2 C_r M} \sum_{k=1}^{n_i} \left\langle \mathbf{u}, \left\{ k_{ik,\delta} \mathbf{z}_{ik} \mathbf{z}_{ik}^T - E(k_{ik,\delta} \mathbf{z}_{ik} \mathbf{z}_{ik}^T) \right\} \mathbf{u}' \right\rangle \right| \right\} \right\} \\
&\leq \prod_{i=1}^M \left\{ 1 + \frac{\lambda^2 M n_i^2}{2a_1^4 C_r^2 M^2} E \left[ \frac{1}{n_i} \sum_{k=1}^{n_i} \left\{ k_{ik,\delta} \langle \mathbf{z}_{ik}, \mathbf{u} \rangle \langle \mathbf{z}_{ik}, \mathbf{u}' \rangle - E(k_{ik,\delta} \langle \mathbf{z}_{ik}, \mathbf{u} \rangle \langle \mathbf{z}_{ik}, \mathbf{u}' \rangle) \right\}^2 \right] \right. \\
&\quad \left. \times \exp \left\{ \frac{\kappa_u |\lambda| \sqrt{M} n_u}{h a_1^2 C_r M} \frac{1}{n_i} \sum_{k=1}^{n_i} |\langle \mathbf{z}_{ik}, \mathbf{u} \rangle \langle \mathbf{z}_{ik}, \mathbf{u}' \rangle| \right\} \exp \left\{ \frac{f_u |\lambda| \sqrt{M} n_u}{a_1^2 C_r M} |E[\langle \mathbf{z}_{ik}, \mathbf{u} \rangle \langle \mathbf{z}_{ik}, \mathbf{u}' \rangle]| \right\} \right\} \\
&\leq \prod_{i=1}^M \left\{ 1 + \frac{\lambda^2 M n_u^2}{2a_1^4 C_r^2 M^2} E \left[ \frac{1}{n_i} \sum_{k=1}^{n_i} \left\{ k_{ik,\delta} \langle \mathbf{z}_{ik}, \mathbf{u} \rangle \langle \mathbf{z}_{ik}, \mathbf{u}' \rangle - E(k_{ik,\delta} \langle \mathbf{z}_{ik}, \mathbf{u} \rangle \langle \mathbf{z}_{ik}, \mathbf{u}' \rangle) \right\}^2 \right] \right. \\
&\quad \left. \times \exp \left\{ \frac{\kappa_u |\lambda| \sqrt{M} n_u}{h a_1^2 C_r M} |\langle \mathbf{z}_{ik'}, \mathbf{u} \rangle \langle \mathbf{z}_{ik'}, \mathbf{u}' \rangle| \right\} \exp \left\{ \frac{f_u |\lambda| \sqrt{M} n_u}{a_1^2 C_r M} \right\} \right\},
\end{aligned}$$

where  $k' = \operatorname{argmax}_{1 \leq k \leq n_i} |\langle \mathbf{z}_{ik}, \mathbf{u} \rangle \langle \mathbf{z}_{ik}, \mathbf{u}' \rangle|$ . Let  $|\lambda| \leq \min \{ h/(4n_u \kappa_u \sqrt{M}), 1/(n_u f_u \sqrt{M}) \} C_r M$ ,

then  $\kappa_u |\lambda| \sqrt{M} n_u / (h C_r M) \leq 1/4$  and  $f_u |\lambda| \sqrt{M} n_u / (a_1^2 C_r M) \leq 1$ . Consequently,

$$\begin{aligned}
& E \left[ \exp \left\{ \lambda \sqrt{M} \langle \mathbf{u}, \nabla \Delta_{M,0}(\boldsymbol{\delta}) \mathbf{u}' \rangle / a_1^2 \right\} \right] \\
& \leq \prod_{i=1}^M \left\{ 1 + \frac{\lambda^2 M n_u^2 e}{2 a_1^4 C_r^2 M^2} E \left[ \frac{1}{n_i} \sum_{k=1}^{n_i} \left\{ k_{ik,\delta} \langle \mathbf{z}_{ik}, \mathbf{u} \rangle \langle \mathbf{z}_{ik}, \mathbf{u}' \rangle - E(k_{ik,\delta} \langle \mathbf{z}_{ik}, \mathbf{u} \rangle \langle \mathbf{z}_{ik}, \mathbf{u}' \rangle) \right\}^2 \right. \right. \\
& \quad \left. \left. \times \exp \left\{ |\langle \mathbf{z}_{ik'}, \mathbf{u} \rangle \langle \mathbf{z}_{ik'}, \mathbf{u}' \rangle| / (4 a_1^2) \right\} \right] \right\} \\
& \leq \prod_{i=1}^M \left\{ 1 + \frac{\lambda^2 M n_u^2 e}{a_1^4 C_r^2 M^2} E \left[ \frac{1}{n_i} \sum_{k=1}^{n_i} \left\{ (k_{ik,\delta} \langle \mathbf{z}_{ik}, \mathbf{u} \rangle \langle \mathbf{z}_{ik}, \mathbf{u}' \rangle)^2 + [E(k_{ik,\delta} \langle \mathbf{z}_{ik}, \mathbf{u} \rangle \langle \mathbf{z}_{ik}, \mathbf{u}' \rangle)]^2 \right\} \right. \right. \\
& \quad \left. \left. \times \exp \left\{ |\langle \mathbf{z}_{ik'}, \mathbf{u} \rangle \langle \mathbf{z}_{ik'}, \mathbf{u}' \rangle| / (4 a_1^2) \right\} \right] \right\} \\
& = \prod_{i=1}^M \left\{ 1 + \frac{\lambda^2 M n_u^2 e}{a_1^4 C_r^2 M^2} E \left\{ \frac{1}{n_i} \sum_{k=1}^{n_i} (k_{ik,\delta} \langle \mathbf{z}_{ik}, \mathbf{u} \rangle \langle \mathbf{z}_{ik}, \mathbf{u}' \rangle)^2 e^{|\langle \mathbf{z}_{ik'}, \mathbf{u} \rangle \langle \mathbf{z}_{ik'}, \mathbf{u}' \rangle| / (4 a_1^2)} \right\} \right. \\
& \quad \left. + \frac{\lambda^2 M n_u^2 e}{a_1^4 C_r^2 M^2} \left\{ E(k_{ik,\delta} \langle \mathbf{z}_{ik}, \mathbf{u} \rangle \langle \mathbf{z}_{ik}, \mathbf{u}' \rangle) \right\}^2 E \left[ e^{|\langle \mathbf{z}_{ik'}, \mathbf{u} \rangle \langle \mathbf{z}_{ik'}, \mathbf{u}' \rangle| / (4 a_1^2)} \right] \right\} \\
& \leq \prod_{i=1}^M \left\{ 1 + \frac{\lambda^2 M n_u^2 e}{a_1^4 C_r^2 M^2} \frac{1}{n_i} \sum_{k=1}^{n_i} E \left\{ (k_{ik,\delta} \langle \mathbf{z}_{ik}, \mathbf{u} \rangle \langle \mathbf{z}_{ik}, \mathbf{u}' \rangle)^2 e^{|\langle \mathbf{z}_{ik'}, \mathbf{u} \rangle \langle \mathbf{z}_{ik'}, \mathbf{u}' \rangle| / (4 a_1^2)} \right\} \right. \\
& \quad \left. + \frac{\lambda^2 M n_u^2 e}{a_1^4 C_r^2 M^2} f_u E \left[ e^{\langle \mathbf{z}_{ik'}, \mathbf{u} \rangle^2 / (2 \cdot 4 a_1^2) + \langle \mathbf{z}_{ik'}, \mathbf{u}' \rangle^2 / (2 \cdot 4 a_1^2)} \right] \right\} \\
& \leq \prod_{i=1}^M \left\{ 1 + \frac{\lambda^2 M n_u^2 e \kappa_u}{a_1^4 C_r^2 M^2 h} E \left\{ (\langle \mathbf{z}_{ik'}, \mathbf{u} \rangle \langle \mathbf{z}_{ik'}, \mathbf{u}' \rangle)^2 e^{|\langle \mathbf{z}_{ik'}, \mathbf{u} \rangle \langle \mathbf{z}_{ik'}, \mathbf{u}' \rangle| / (4 a_1^2)} \right\} + 3 \frac{\lambda^2 M n_u^2 e f_u}{a_1^4 C_r^2 M^2} \right\} \\
& \leq \prod_{i=1}^M \left\{ 1 + \frac{\lambda^2 M n_u^2 e \kappa_u}{a_1^4 C_r^2 M^2 h} \left[ E \langle \mathbf{z}_{ik'}, \mathbf{u} \rangle^4 e^{\langle \mathbf{z}_{ik'}, \mathbf{u} \rangle^2 / (4 a_1^2)} \right]^{1/2} \left[ E \langle \mathbf{z}_{ik'}, \mathbf{u}' \rangle^4 e^{\langle \mathbf{z}_{ik'}, \mathbf{u}' \rangle^2 / (4 a_1^2)} \right]^{1/2} \right. \\
& \quad \left. + 3 \frac{\lambda^2 M n_u^2 e f_u}{a_1^4 C_r^2 M^2} \right\} \\
& \leq \prod_{i=1}^M \left\{ 1 + 8 \frac{\lambda^2 M n_u^2 e \kappa_u}{a_1^4 C_r^2 M^2 h} 16 a_1^4 + 3 \frac{\lambda^2 M n_u^2 e f_u}{a_1^4 C_r^2 M^2} \right\} \leq \prod_{i=1}^M \left\{ 1 + \frac{C^2 M n_u^2 \lambda^2}{2 C_r^2 M^2 h} \right\} \\
& \leq \prod_{i=1}^M \exp \left\{ \frac{C^2 n_u^2 \lambda^2}{2 C_r^2 M h} \right\} = \exp \left\{ \frac{C^2 n_u^2 \lambda^2}{2 C_r^2 h} \right\},
\end{aligned}$$

where  $C > 0$  depends on  $(f_u, \kappa_u)$ .

Let  $v_0 = C n_u C_r^{-1} h^{-1/2}$  and  $g = \min \{h / (4 n_u \kappa_u), 1 / (n_u f_u)\} C_r \sqrt{M/2}$ . After applying Theorem A.3 of Spokoiny (2013) [8] to the process  $\{\sqrt{M} \Delta_{M,0}(\boldsymbol{\delta}) / a_1^2, \boldsymbol{\delta} \in \mathbb{B}^p(r)\}$  with  $\mathbb{B}^p(r) = \{\boldsymbol{\delta} \in \mathbb{R}^p : \|\boldsymbol{\delta}\|_2 \leq r\}$ , we have

$$\sup_{\boldsymbol{\beta} \in \mathbb{B}_{\Sigma}(r)} \left\| \Delta_M(\boldsymbol{\beta}) - E[\Delta_M(\boldsymbol{\beta})] \right\|_2 \leq 6 C_r^{-1} C n_u r a_1^2 \sqrt{\frac{4p + 2\gamma}{Mh}} \quad (19)$$

with probability at least  $1 - e^{-\gamma}$  for any  $\gamma \geq 0$  as long as  $h \geq 8 C_r^{-1} \kappa_u n_u \sqrt{(2p + \gamma)/M}$

and  $M \geq 4 C_r^{-2} f_u^2 n_u^2 (2p + \gamma)$ . Together with (13), (18) and (19), for any  $\gamma \geq 0$ ,

$$\sup_{\beta \in \mathbb{B}_{\Sigma}(\tau)} \left\| \Delta_M(\beta) \right\|_2 \leq 0.5 C_r^{-1} n_u \mu_3 L_0 r^2 + 6 C_r^{-1} C n_u a_1^2 r \sqrt{\frac{4p + 2\gamma}{Mh}}$$

holds with probability at least  $1 - e^{-\gamma}$ . ■

**Lemma 4.** Assume that Conditions (A2)–(A7) hold. For any  $\gamma > 0$ , as long as  $M \gtrsim p + \gamma$ ,

$$\left\| \mathfrak{T}_M(\beta_\tau) \right\|_2 = \left\| \Sigma^{-1/2} \mathbf{U}_M(\beta_\tau) \right\|_2 \lesssim C_2 \left( \sqrt{\frac{p + \gamma}{M}} + h^2 \right)$$

holds with probability at least  $1 - e^{-\gamma}$ , where  $C_2 > 0$  is a constant depending on  $(\tau, L_0, n_u, \kappa_2, a_1, h, \xi_{\min})$ .

*Proof.* Assume that  $\mathbf{x}_{ik}$  ( $1 \leq i \leq M, 1 \leq k \leq n_i$ ) satisfies Condition (A7). Let  $\varpi_{ik} = K(-(\mathbf{y}_{ik} - \mathbf{x}_{ik}^\top \beta_\tau)/h) - \tau$  and  $\boldsymbol{\varpi}_i = (\varpi_{i1}, \dots, \varpi_{in_i})^\top = \mathbf{K}(-(\mathbf{y}_i - \mathbf{x}_i \beta_\tau)/h) - \mathbf{1}_{n_i} \cdot \tau$ . Denote  $\boldsymbol{\Omega}_i = \mathbf{A}_i^{-1/2} \mathbf{R}_i^{-1} \mathbf{A}_i^{-1/2}$ . According to He et al. (2023)[4], for any  $\varepsilon \in (0, 1)$ , there exists an  $\varepsilon$ -net  $\mathcal{N}_\varepsilon$  of the unit sphere  $\mathbb{S}^{p-1}$  with cardinality  $|\mathcal{N}_\varepsilon| \leq (1 + 2/\varepsilon)^p$  such that

$$\begin{aligned} \left\| \Sigma^{-1/2} \left\{ \mathbf{U}_M(\beta_\tau) - E[\mathbf{U}_M(\beta_\tau)] \right\} \right\|_2 &= \left\| \frac{1}{M} \sum_{i=1}^M \left\{ \mathbf{z}_i^\top \boldsymbol{\Omega}_i \boldsymbol{\varpi}_i - E[\mathbf{z}_i^\top \boldsymbol{\Omega}_i \boldsymbol{\varpi}_i] \right\} \right\|_2 \\ &\leq (1 - \varepsilon)^{-1} \max_{\mathbf{u} \in \mathcal{N}_\varepsilon} \left\langle \mathbf{u}, \frac{1}{M} \sum_{i=1}^M \left\{ \mathbf{z}_i^\top \boldsymbol{\Omega}_i \boldsymbol{\varpi}_i - E[\mathbf{z}_i^\top \boldsymbol{\Omega}_i \boldsymbol{\varpi}_i] \right\} \right\rangle. \end{aligned}$$

Let  $\mathcal{X}_{\mathbf{u},i} = \mathbf{u}^\top \mathbf{z}_i^\top \boldsymbol{\Omega}_i \boldsymbol{\varpi}_i$  for each direction  $\mathbf{u} \in \mathcal{N}_\varepsilon$ , we have

$$\begin{aligned} \sum_{i=1}^M E(\mathcal{X}_{\mathbf{u},i})^2 &= \sum_{i=1}^M E(\mathbf{u}^\top \mathbf{z}_i^\top \boldsymbol{\Omega}_i \boldsymbol{\varpi}_i)^2 \leq \frac{1}{C_r^2} \sum_{i=1}^M E(\mathbf{u}^\top \mathbf{z}_i^\top \boldsymbol{\varpi}_i)^2 \\ &\leq \frac{1}{C_r^2} \sum_{i=1}^M E \left( \sum_{k=1}^{n_i} \langle \mathbf{u}, \mathbf{z}_{ik} \varpi_{ik} \rangle \right)^2 \leq \frac{n_u^2}{C_r^2} \sum_{i=1}^M E[\langle \mathbf{u}, \mathbf{z} \rangle^2 \varpi^2], \end{aligned}$$

where  $\varpi = K(-\epsilon/h) - \tau$  with  $\epsilon$  the random variable of  $\epsilon_{ik} = \mathbf{y}_{ik} - \mathbf{x}_{ik}^\top \beta_\tau$ . At follows, we derive the upper bound for  $E(\varpi^2 | \mathbf{x})$ , which involves calculating  $E[K^2(-\epsilon/h) | \mathbf{x}]$  and  $E[K(-\epsilon/h) | \mathbf{x}]$ . Note that

$$\begin{aligned} E \left[ K^2 \left( \frac{-\epsilon}{h} \right) \middle| \mathbf{x} \right] &= \int_{-\infty}^{+\infty} K^2 \left( \frac{-t}{h} \right) f_{\epsilon|\mathbf{x}}(t) dt = h \int_{-\infty}^{+\infty} K^2(u) f_{\epsilon|\mathbf{x}}(-uh) du \\ &= - \int_{-\infty}^{+\infty} K^2(u) dF_{\epsilon|\mathbf{x}}(-uh) = 2 \int_{-\infty}^{+\infty} K(u) k(u) F_{\epsilon|\mathbf{x}}(-uh) du. \quad (20) \end{aligned}$$

Let

$$0 < u_k = \int_{-\infty}^{+\infty} u k(u) K(u) du = \int_0^{+\infty} k(u) (1 - k(u)) du \leq \kappa_1. \quad (21)$$

Since  $F_{\epsilon|\mathbf{x}}(0) = P(\epsilon \leq 0|\mathbf{x}) = \tau$  and

$$\begin{aligned} F_{\epsilon|\mathbf{x}}(-uh) &= F_{\epsilon|\mathbf{x}}(0) + \int_0^{-uh} f_{\epsilon|\mathbf{x}}(t) dt \\ &= \tau + (-uh) f_{\epsilon|\mathbf{x}}(0) + \int_0^{-uh} [f_{\epsilon|\mathbf{x}}(t) - f_{\epsilon|\mathbf{x}}(0)] dt. \end{aligned} \quad (22)$$

Based on (20)–(22) and Conditions (A5) and (A6), we have

$$\begin{aligned} E \left[ K^2 \left( -\frac{\epsilon}{h} \right) \middle| \mathbf{x} \right] &= 2\tau \int_{-\infty}^{+\infty} k(u)K(u)du - 2hf_{\epsilon|\mathbf{x}}(0) \int_{-\infty}^{+\infty} uk(u)K(u)du \\ &\quad + 2 \int_{-\infty}^{+\infty} k(u)K(u) \int_0^{-uh} [f_{\epsilon|\mathbf{x}}(t) - f_{\epsilon|\mathbf{x}}(0)] dt du \\ &\leq \tau - 2hf_{\epsilon|\mathbf{x}}(0)u_k + L_0h^2 \int_{-\infty}^{+\infty} u^2k(u)K(u)du \\ &\leq \tau + L_0\kappa_2h^2. \end{aligned} \quad (23)$$

Similarly to (22),

$$E \left[ K \left( \frac{-\epsilon}{h} \right) \middle| \mathbf{x} \right] = \tau + \int_{-\infty}^{+\infty} k(u) \int_0^{-uh} [f_{\epsilon|\mathbf{x}}(t) - f_{\epsilon|\mathbf{x}}(0)] dt du.$$

Based on the Lipschitz condition of  $f_{\epsilon|\mathbf{x}}(\cdot)$ ,

$$\left| E \left[ K \left( \frac{-\epsilon}{h} \right) \middle| \mathbf{x} \right] - \tau \right| \leq 0.5L_0\kappa_2h^2.$$

Therefore,

$$\tau - 0.5L_0\kappa_2h^2 \leq E \left[ K \left( \frac{-\epsilon}{h} \right) \middle| \mathbf{x} \right] \leq \tau + 0.5L_0\kappa_2h^2. \quad (24)$$

Together with (23) and (24),

$$\begin{aligned} E(\varpi^2|\mathbf{x}) &= E \left[ K^2 \left( \frac{-\epsilon}{h} \right) \middle| \mathbf{x} \right] - 2\tau E \left[ K \left( \frac{-\epsilon}{h} \right) \middle| \mathbf{x} \right] + \tau^2 \\ &\leq \tau + L_0\kappa_2h^2 - 2\tau(\tau - 0.5L_0\kappa_2h^2) + \tau^2 \\ &= \tau(1 - \tau) + (\tau + 1)L_0\kappa_2h^2 = C_\tau^2. \end{aligned}$$

Therefore,  $\sum_{i=1}^M E(\mathcal{X}_{\mathbf{u},i})^2 \leq C_r^{-2} M n_u^2 C_\tau^2$ . Since  $|\varpi| \leq \max(1 - \tau, \tau) = \bar{\tau}$ . Based on Condition (A7), for  $\iota \geq 3$ , we have  $P(|x_j| \geq a_0\sigma_{jj}^{1/2}\gamma) \leq e^{-\gamma}$ , where  $a_0$  is a constant depending on  $a_1$ . Therefore, for all  $\gamma \geq 0$ ,

$$\begin{aligned} E|\varpi x_j|^\iota &= E_{\mathbf{x}}[|x_j|^\iota E(|\varpi|^\iota|\mathbf{x})] \leq \bar{\tau}^{\iota-2} E_{\mathbf{x}}[|x_j|^\iota E(\varpi^2|\mathbf{x})] \\ &\leq \bar{\tau}^{\iota-2} C_\tau^2 a_0^\iota \sigma_{jj}^{\iota/2} \int_0^{+\infty} \iota \gamma^{\iota-1} P(|x_j| \geq a_0\sigma_{jj}^{1/2}\gamma) d\gamma \\ &\leq \bar{\tau}^{\iota-2} C_\tau^2 a_0^\iota \sigma_{jj}^{\iota/2} \iota \int_0^{+\infty} \gamma^{\iota-1} e^{-\gamma} d\gamma = \bar{\tau}^{\iota-2} C_\tau^2 a_0^\iota \sigma_{jj}^{\iota/2} \iota! \\ &\leq \frac{\iota!}{2} C_\tau^2 a_0^2 \sigma_{jj} [2\bar{\tau} a_0 \sigma_{jj}^{1/2}]^{\iota-2}. \end{aligned}$$

Thus,  $E(|\langle \mathbf{u}, \mathbf{z}_{ik} \boldsymbol{\varpi}_{ik} \rangle|^\iota) \leq (\iota!/2) C_\tau^2 a_0^2 (2\bar{\tau} a_0)^{\iota-2}$  for  $\iota \geq 3$ . This implies that for all integers  $\iota \geq 3$ ,

$$\begin{aligned} \sum_{i=1}^M E(|\mathcal{X}_{\mathbf{u},i}|^\iota) &= \sum_{i=1}^M E(|\mathbf{u}^\top \mathbf{z}_i^\top \boldsymbol{\Omega}_i \boldsymbol{\varpi}_i|^\iota) \leq \frac{1}{C_r^\iota} \sum_{i=1}^M E\left(\left|\sum_{k=1}^{n_i} \langle \mathbf{u}, \mathbf{z}_{ik} \boldsymbol{\varpi}_{ik} \rangle\right|^\iota\right) \\ &\leq \frac{\iota!}{2} M C_r^{-2} n_u^2 C_\tau^2 a_0^2 (2\bar{\tau} a_0 n_u C_r^{-1})^{\iota-2}. \end{aligned}$$

According to the Bernstein's inequality in Theorem 2.10 of Boucheron (2013) [1], for all  $\gamma > 0$ ,

$$\max_{\mathbf{u} \in \mathcal{N}_\varepsilon} \left\langle \mathbf{u}, \frac{1}{M} \sum_{i=1}^M \left\{ \mathbf{z}_i^\top \boldsymbol{\Omega}_i \boldsymbol{\varpi}_i - E[\mathbf{z}_i^\top \boldsymbol{\Omega}_i \boldsymbol{\varpi}_i] \right\} \right\rangle \leq C_r^{-1} a_0 n_u \left[ C_\tau \sqrt{\frac{2\gamma}{M}} + \bar{\tau} \frac{2\gamma}{M} \right]$$

holds with probability at least  $1 - e^{-\gamma}$ . Applying a union bound over all vectors  $\mathbf{u} \in \mathcal{N}_\varepsilon$ ,

$$\left\| \boldsymbol{\Sigma}^{-1/2} \left\{ \mathbf{U}_M(\boldsymbol{\beta}_\tau) - E[\mathbf{U}_M(\boldsymbol{\beta}_\tau)] \right\} \right\|_2 \leq \frac{a_0 n_u}{(1-\varepsilon) C_r} \left[ C_\tau \sqrt{\frac{2\gamma}{M}} + \bar{\tau} \frac{2\gamma}{M} \right]$$

holds with probability at least  $1 - e^{\log(1+2/\varepsilon)p-\gamma}$ . After taking  $\varepsilon = 2/(e^2 - 1)$  and replacing  $\gamma$  by  $2p + \gamma$ , we have

$$\left\| \boldsymbol{\Sigma}^{-1/2} \left\{ \mathbf{U}_M(\boldsymbol{\beta}_\tau) - E[\mathbf{U}_M(\boldsymbol{\beta}_\tau)] \right\} \right\|_2 \leq 1.46 C_r^{-1} a_0 n_u \left[ C_\tau \sqrt{\frac{4p+2\gamma}{M}} + \bar{\tau} \frac{4p+2\gamma}{M} \right] \quad (25)$$

with probability at least  $1 - e^{-\gamma}$ . Also because

$$\begin{aligned} \omega_M^* &= \left\| \boldsymbol{\Sigma}^{-1/2} E[\mathbf{U}_M(\boldsymbol{\beta}_\tau)] \right\|_2 = \left\| \frac{1}{M} \sum_{i=1}^M E[\mathbf{z}_i^\top \boldsymbol{\Omega}_i \boldsymbol{\varpi}_i] \right\|_2 \\ &\leq \sup_{\mathbf{u} \in \mathbb{S}^{p-1}} \left| \frac{1}{M} \sum_{i=1}^M \frac{n_u}{C_r} E\left\{ [K(-\epsilon/h) - \tau] \langle \mathbf{z}, \mathbf{u} \rangle \right\} \right| \\ &\leq \frac{n_u}{C_r} \sup_{\mathbf{u} \in \mathbb{S}^{p-1}} \left\{ E_{\mathbf{z}} \left| \int_{-\infty}^{+\infty} k(u) \int_0^{-hu} [f_{\epsilon|\mathbf{x}}(t) - f_{\epsilon|\mathbf{x}}(0)] dt \cdot d\mathbf{u} \cdot \mathbf{z}^\top \mathbf{u} \right| \right\} \\ &\leq 0.5 C_r^{-1} n_u L_0 \kappa_2 h^2. \end{aligned} \quad (26)$$

Together with (25) and (26), as long as  $M \gtrsim p + \gamma$ ,

$$\begin{aligned} \left\| \boldsymbol{\Sigma}^{-1/2} \mathbf{U}_M(\boldsymbol{\beta}_\tau) \right\|_2 &\leq \left\| \boldsymbol{\Sigma}^{-1/2} \left\{ \mathbf{U}_M(\boldsymbol{\beta}_\tau) - E[\mathbf{U}_M(\boldsymbol{\beta}_\tau)] \right\} \right\|_2 + \left\| \boldsymbol{\Sigma}^{-1/2} E[\mathbf{U}_M(\boldsymbol{\beta}_\tau)] \right\|_2 \\ &\leq 1.46 C_r^{-1} a_0 n_u \left[ C_\tau \sqrt{\frac{4p+2\gamma}{M}} + \bar{\tau} \frac{4p+2\gamma}{M} \right] + 0.5 C_r^{-1} n_u L_0 \kappa_2 h^2 \\ &\lesssim C_2 \left( \sqrt{\frac{p+\gamma}{M}} + h^2 \right) \end{aligned}$$

holds with probability at least  $1 - e^{-\gamma}$ , where  $C_2 > 0$  is a constant depending on  $(\tau, L_0, n_u, \kappa_2, a_1, h, \xi_{\min})$ . This completes the proof.  $\blacksquare$

**Lemma 5.** Under Conditions (A2)–(A6),

$$\sup_{\beta \in \mathbb{B}_{\Sigma}(r)} \|\mathfrak{F}_M(\beta)\|_2 = \sup_{\beta \in \mathbb{B}_{\Sigma}(r)} \left\| \Sigma^{-1/2} [\mathbf{H}_M(\beta) - \mathbf{H}_M(\beta_\tau)] (\beta - \beta_\tau) \right\|_2 \leq C_3 r^2,$$

where  $C_3 > 0$  is a constant depending only on  $(\tau, L_0, n_u, \mu_3, \xi_{\min})$ .

*Proof.* For  $\zeta = \beta - \beta_\tau$ ,  $\delta = \Sigma^{1/2} \zeta$ , and  $\mathbf{v} = \delta / \|\delta\|_2$ , we have

$$\begin{aligned} & \sup_{\beta \in \mathbb{B}_{\Sigma}(r)} \left\| \Sigma^{-1/2} [\mathbf{H}_M(\beta) - \mathbf{H}_M(\beta_\tau)] \zeta \right\|_2 \\ &= \sup_{\beta \in \mathbb{B}_{\Sigma}(r)} \left\| \frac{1}{M} \sum_{i=1}^M E \left\{ \Sigma^{-1/2} \mathbf{x}_i^T \Omega_i [\Lambda_i(\beta) - \Lambda_i(\beta_\tau)] \mathbf{x}_i \Sigma^{-1/2} \Sigma^{1/2} \zeta \right\} \right\|_2 \\ &= \sup_{\delta \in \mathbb{B}^p(r)} \sup_{\mathbf{u} \in \mathbb{S}^{p-1}} \left| \frac{1}{M} \sum_{i=1}^M E \left[ \mathbf{u}^T \mathbf{z}_i^T \Omega_i \text{diag} \left( \frac{1}{h} \left\{ k \left( \frac{\mathbf{z}_{ik}^T \delta - \epsilon_{ik}}{h} \right) - k \left( \frac{-\epsilon_{ik}}{h} \right) \right\}_{k=1}^{n_i} \right) \mathbf{z}_i \delta \right] \right| \\ &\leq \sup_{\delta \in \mathbb{B}^p(r)} \sup_{\mathbf{u} \in \mathbb{S}^{p-1}} \frac{1}{M} \sum_{i=1}^M \frac{1}{C_r} \sum_{k=1}^{n_i} E \left| \mathbf{u}^T \mathbf{z}_{ik} \int_{-\infty}^{\infty} k(u) [f_{\epsilon|\mathbf{x}}(\mathbf{z}_{ik}^T \delta - hu) - f_{\epsilon|\mathbf{x}}(-hu)] du \cdot \mathbf{z}_{ik}^T \delta \right| \\ &\leq \frac{n_u L_0}{C_r} \sup_{\delta \in \mathbb{B}^p(r)} \sup_{\mathbf{u}, \mathbf{v} \in \mathbb{S}^{p-1}} E(|\langle \mathbf{z}, \mathbf{u} \rangle| |\langle \mathbf{z}, \mathbf{v} \rangle|^2) \cdot \|\delta\|_2^2 \quad (\text{by Conditions (A5) and (A6)}) \\ &\leq \frac{n_u L_0}{C_r} \mu_3 \cdot r^2 = C_3 r^2. \end{aligned}$$

■

**Lemma 6.** Under Conditions (A2)–(A6),

$$\begin{aligned} \sup_{\beta \in \mathbb{B}_{\Sigma}(r)} \|\mathfrak{F}_{M,l}(\beta)\|_2 &= \sup_{\beta \in \mathbb{B}_{\Sigma}(r)} \left\| \Sigma^{-1/2} [\mathbf{H}_M(\beta) - \mathbf{H}_{m,l}(\beta)] (\beta - \beta_\tau) \right\|_2 \\ &\leq [C_4(1 - L^{-1}) + C_5|h_l - h|] r, \end{aligned}$$

where  $C_4 > 0$  is a constant depending only on  $(\tau, n_u, f_u, \xi_{\min})$ ,  $C_5 > 0$  is a constant depending only on  $(\tau, n_u, L_0, \kappa_1, \xi_{\min})$ .

*Proof.* Define  $\mathbf{H}_{i,h}(\beta) = E[\mathbf{x}_i^T \Omega_i \Lambda_i(\beta) \mathbf{x}_i]$ , where the  $k$ th diagonal element of  $\Lambda_i(\beta)$  is  $k((\mathbf{z}_{ik}^T \delta - \epsilon_{ik})/h)/h$ . Then, we have the decomposition:

$$\begin{aligned} & \left\| \Sigma^{-1/2} [\mathbf{H}_M(\beta) - \mathbf{H}_{m,l}(\beta)] (\beta - \beta_\tau) \right\|_2 \\ &\leq \left\| \Sigma^{-1/2} \left[ \frac{1}{M} \sum_{i=1}^M \mathbf{H}_{i,h}(\beta) - \frac{1}{m} \sum_{i \in \mathcal{I}_l} \mathbf{H}_{i,h}(\beta) \right] (\beta - \beta_\tau) \right\|_2 \\ &\quad + \left\| \Sigma^{-1/2} \frac{1}{m} \sum_{i \in \mathcal{I}_l} [\mathbf{H}_{i,h}(\beta) - \mathbf{H}_{i,h_l}(\beta)] (\beta - \beta_\tau) \right\|_2. \end{aligned} \tag{27}$$

Define the coefficients  $a_{i,l} = 1/M - 1/m$  for  $i \in \mathcal{I}_l$  and  $a_{i,l} = 1/M$  for  $i \notin \mathcal{I}_l$ . Then,  $\sum_{i=1}^M a_{i,l} = 0$  and  $\sum_{i=1}^M |a_{i,l}| = \sum_{i \in \mathcal{I}_l} (1/m - 1/M) + \sum_{i \notin \mathcal{I}_l} 1/M = 2(1 - m/M)$ . Thus,

$$\frac{1}{M} \sum_{i=1}^M \mathbf{H}_{i,h}(\beta) - \frac{1}{m} \sum_{i \in \mathcal{I}_l} \mathbf{H}_{i,h}(\beta) = \sum_{i=1}^M a_{i,l} \mathbf{H}_{i,h}(\beta). \tag{28}$$

Next, we bound the norm of each term in (27). First,

$$\begin{aligned}
& \sup_{\beta \in \mathbb{B}_{\Sigma}(r)} \left\| \Sigma^{-1/2} \mathbf{H}_{i,h}(\beta) (\beta - \beta_{\tau}) \right\|_2 \\
&= \sup_{\delta \in \mathbb{B}^p(r)} \sup_{\mathbf{u} \in \mathbb{S}^{p-1}} \left| E \left[ \mathbf{u}^T \mathbf{z}_i^T \Omega_i \text{diag} \left( \left\{ \frac{1}{h} k \left( \frac{\mathbf{z}_{ik}^T \delta - \epsilon_{ik}}{h} \right) \right\}_{k=1}^{n_i} \right) \mathbf{z}_i \right] \delta \right| \\
&\leq \sup_{\delta \in \mathbb{B}^p(r)} \sup_{\mathbf{u} \in \mathbb{S}^{p-1}} \left| \frac{1}{C_r} \sum_{k=1}^{n_i} E \left[ \mathbf{u}^T \mathbf{z}_{ik} \int_{-\infty}^{\infty} k(u) f_{\epsilon|\mathbf{x}}(\mathbf{z}_{ik}^T \delta - hu) du \cdot \mathbf{z}_{ik}^T \delta \right] \right| \\
&\leq \frac{f_u n_u}{C_r} \sup_{\delta \in \mathbb{B}^p(r)} \sup_{\mathbf{u}, \mathbf{v} \in \mathbb{S}^{p-1}} E(|\langle \mathbf{z}, \mathbf{u} \rangle \langle \mathbf{z}, \mathbf{v} \rangle|) \cdot \|\delta\|_2 \leq \frac{f_u n_u r}{C_r}.
\end{aligned} \tag{29}$$

From (28) and (29), we obtain:

$$\begin{aligned}
& \sup_{\beta \in \mathbb{B}_{\Sigma}(r)} \left\| \Sigma^{-1/2} \left[ \frac{1}{M} \sum_{i=1}^M \mathbf{H}_{i,h}(\beta) - \frac{1}{m} \sum_{i \in \mathcal{I}_l} \mathbf{H}_{i,h}(\beta) \right] (\beta - \beta_{\tau}) \right\|_2 \\
&\leq \sum_{i=1}^M |a_{i,l}| \sup_{\beta \in \mathbb{B}_{\Sigma}(r)} \left\| \Sigma^{-1/2} \mathbf{H}_{i,h}(\beta) (\beta - \beta_{\tau}) \right\|_2 \\
&\leq 2 \left( 1 - \frac{m}{M} \right) \frac{f_u n_u r}{C_r} = C_4 \left( 1 - \frac{m}{M} \right) r,
\end{aligned} \tag{30}$$

where  $C_4 = 2 C_r^{-1} f_u n_u$ .

For the second term in (27), we have:

$$\begin{aligned}
& \sup_{\beta \in \mathbb{B}_{\Sigma}(r)} \left\| \Sigma^{-1/2} \frac{1}{m} \sum_{i \in \mathcal{I}_l} \left[ \mathbf{H}_{i,h}(\beta) - \mathbf{H}_{i,h_l}(\beta) \right] (\beta - \beta_{\tau}) \right\|_2 \\
&\leq \sup_{\delta \in \mathbb{B}^p(r)} \sup_{\mathbf{u} \in \mathbb{S}^{p-1}} \left| \frac{1}{m} \sum_{i \in \mathcal{I}_l} \frac{1}{C_r} \sum_{k=1}^{n_i} E \left[ \mathbf{u}^T \mathbf{z}_{ik} \int_{-\infty}^{\infty} k(u) [f_{\epsilon|\mathbf{x}}(\mathbf{z}_{ik}^T \delta - hu) \right. \right. \\
&\quad \left. \left. - f_{\epsilon|\mathbf{x}}(\mathbf{z}_{ik}^T \delta - h_l u)] du \cdot \mathbf{z}_{ik}^T \delta \right] \right| \\
&\leq \frac{n_u}{C_r} L_0 \int_{-\infty}^{\infty} |u| k(u) du \cdot |h_l - h| \sup_{\delta \in \mathbb{B}^p(r)} \sup_{\mathbf{u}, \mathbf{v} \in \mathbb{S}^{p-1}} E(|\langle \mathbf{z}, \mathbf{u} \rangle \langle \mathbf{z}, \mathbf{v} \rangle|) \cdot \|\delta\|_2 \\
&\leq C_r^{-1} n_u L_0 \kappa_1 |h_l - h| r = C_5 |h_l - h| r,
\end{aligned} \tag{31}$$

where  $C_5 = C_r^{-1} n_u L_0 \kappa_1$ . Combining (30) and (31), we conclude that

$$\sup_{\beta \in \mathbb{B}_{\Sigma}(r)} \left\| \Sigma^{-1/2} \left[ \mathbf{H}_M(\beta) - \mathbf{H}_{m,l}(\beta) \right] (\beta - \beta_{\tau}) \right\|_2 \leq [C_4(1 - L^{-1}) + C_5|h_l - h|] r.$$

■

**Lemma 7.** Assume that Conditions (A2)–(A7) hold. For any  $\gamma > 0$ , as long as  $m \gtrsim p + \gamma$ ,

$$\sup_{\beta \in \mathbb{B}_{\Sigma}(r)} \|\mathfrak{H}_{m,l}(\beta)\|_2 = \sup_{\beta \in \mathbb{B}_{\Sigma}(r)} \left\| \Sigma^{-1/2} \left[ \mathbf{D}_{m,l}(\beta) - \mathbf{H}_{m,l}(\beta) \right] (\beta - \beta_{\tau}) \right\|_2 \lesssim C_6 r \sqrt{\frac{p + \gamma}{m}}$$

holds with probability at least  $1 - e^{-\gamma}$ , where  $C_6 > 0$  is a constant depending on  $(\tau, n_u, f_u, a_1, \xi_{\min})$ .

*Proof.* The proof is similar to that of Lemma 4. For any  $\varepsilon \in (0, 1)$ , consider an  $\varepsilon$ -net  $\mathcal{N}_\varepsilon$  of the unit sphere  $\mathbb{S}^{p-1}$  with cardinality  $|\mathcal{N}_\varepsilon| \leq (1 + 2/\varepsilon)^p$ . Then,

$$\begin{aligned} & \left\| \Sigma^{-1/2} \left[ \mathbf{D}_{m,l}(\beta) - \mathbf{H}_{m,l}(\beta) \right] (\beta - \beta_\tau) \right\|_2 \\ &= \left\| \frac{1}{m} \sum_{i \in \mathcal{I}_l} \left\{ \mathbf{z}_i^\top \boldsymbol{\Omega}_i \boldsymbol{\Lambda}_i(\beta) \mathbf{z}_i - E \left[ \mathbf{z}_i^\top \boldsymbol{\Omega}_i \boldsymbol{\Lambda}_i(\beta) \mathbf{z}_i \right] \right\} \boldsymbol{\delta} \right\|_2 \\ &\leq (1 - \varepsilon)^{-1} \max_{\mathbf{u} \in \mathcal{N}_\varepsilon} \left\langle \mathbf{u}, \frac{1}{m} \sum_{i \in \mathcal{I}_l} \left\{ \mathbf{z}_i^\top \boldsymbol{\Omega}_i \boldsymbol{\Lambda}_i(\beta) \mathbf{z}_i - E \left[ \mathbf{z}_i^\top \boldsymbol{\Omega}_i \boldsymbol{\Lambda}_i(\beta) \mathbf{z}_i \right] \right\} \boldsymbol{\delta} \right\rangle. \end{aligned}$$

From Condition (A7),  $P(|z_j| \geq a_0 \gamma) \leq e^{-\gamma}$ , where  $z_j$  is the  $j$ th component of  $\mathbf{z}$  and  $a_0$  is a constant depending on  $a_1$ . Thus, for any integer  $\iota \geq 2$ ,

$$E(|z_j|^\iota) = a_0^\iota \int_0^\infty \iota \gamma^{\iota-1} P(|z_j| \geq a_0 \gamma) d\gamma \leq a_0^\iota \int_0^\infty \iota \gamma^{\iota-1} e^{-\gamma} d\gamma = a_0^\iota \iota!,$$

which implies that for any  $\mathbf{u} \in \mathcal{N}_\varepsilon$ ,  $E(|\langle \mathbf{z}, \mathbf{u} \rangle|^\iota) \leq a_0^\iota \iota!$ .

Define  $\mathcal{X}_{\mathbf{u},i} = \mathbf{u}^\top \mathbf{z}_i^\top \boldsymbol{\Omega}_i \boldsymbol{\Lambda}_i(\beta) \mathbf{z}_i \boldsymbol{\delta}$  for each direction  $\mathbf{u} \in \mathcal{N}_\varepsilon$ . We bound the second moment:

$$\begin{aligned} \max_{\mathbf{u} \in \mathcal{N}_\varepsilon} \sum_{i \in \mathcal{I}_l} E(\mathcal{X}_{\mathbf{u},i})^2 &\leq \sup_{\boldsymbol{\delta} \in \mathbb{B}^p(r)} \max_{\mathbf{u} \in \mathcal{N}_\varepsilon} \sum_{i \in \mathcal{I}_l} E[\mathbf{u}^\top \mathbf{z}_i^\top \boldsymbol{\Omega}_i \boldsymbol{\Lambda}_i(\beta) \mathbf{z}_i \boldsymbol{\delta}]^2 \\ &\leq \frac{1}{C_r^2} \sup_{\boldsymbol{\delta} \in \mathbb{B}^p(r)} \max_{\mathbf{u} \in \mathcal{N}_\varepsilon} \sum_{i \in \mathcal{I}_l} E[\mathbf{u}^\top \mathbf{z}_i^\top \boldsymbol{\Lambda}_i(\beta) \mathbf{z}_i \boldsymbol{\delta}]^2 \\ &\leq \frac{1}{C_r^2} \sum_{i \in \mathcal{I}_l} \sup_{\boldsymbol{\delta} \in \mathbb{B}^p(r)} \max_{\mathbf{u} \in \mathcal{N}_\varepsilon} E \left[ \sum_{k=1}^{n_i} \mathbf{u}^\top \mathbf{z}_{ik} \int_{-\infty}^\infty k(u) f_{\epsilon|\mathbf{x}}(\mathbf{z}_{ik}^\top \boldsymbol{\delta} - h_l u) du \cdot \mathbf{z}_{ik}^\top \boldsymbol{\delta} \right]^2 \\ &\leq \frac{m f_u^2 n_u^2}{C_r^2} \sup_{\boldsymbol{\delta} \in \mathbb{B}^p(r)} \max_{\mathbf{u}, \mathbf{v} \in \mathcal{N}_\varepsilon} E(\langle \mathbf{z}, \mathbf{u} \rangle \langle \mathbf{z}, \mathbf{v} \rangle)^2 \cdot \|\boldsymbol{\delta}\|_2^2 \\ &\leq \frac{m f_u^2 n_u^2 r^2}{C_r^2} \cdot 4! a_0^4. \end{aligned}$$

For  $\iota \geq 3$ , the  $\iota$ th moment is bounded by:

$$\begin{aligned} \max_{\mathbf{u} \in \mathcal{N}_\varepsilon} \sum_{i \in \mathcal{I}_l} E(\mathcal{X}_{\mathbf{u},i})^\iota &\leq \sup_{\boldsymbol{\delta} \in \mathbb{B}^p(r)} \max_{\mathbf{u} \in \mathcal{N}_\varepsilon} \sum_{i \in \mathcal{I}_l} E[\mathbf{u}^\top \mathbf{z}_i^\top \boldsymbol{\Omega}_i \boldsymbol{\Lambda}_i(\beta) \mathbf{z}_i \boldsymbol{\delta}]^\iota \\ &\leq \frac{1}{C_r^\iota} \sum_{i \in \mathcal{I}_l} \sup_{\boldsymbol{\delta} \in \mathbb{B}^p(r)} \max_{\mathbf{u} \in \mathcal{N}_\varepsilon} E \left[ \sum_{k=1}^{n_i} \mathbf{u}^\top \mathbf{z}_{ik} \int_{-\infty}^\infty k(u) f_{\epsilon|\mathbf{x}}(\mathbf{z}_{ik}^\top \boldsymbol{\delta} - h_l u) du \cdot \mathbf{z}_{ik}^\top \boldsymbol{\delta} \right]^\iota \\ &\leq \frac{m f_u^\iota n_u^\iota}{C_r^\iota} \sup_{\boldsymbol{\delta} \in \mathbb{B}^p(r)} \max_{\mathbf{u}, \mathbf{v} \in \mathcal{N}_\varepsilon} E(|\langle \mathbf{z}, \mathbf{u} \rangle \langle \mathbf{z}, \mathbf{v} \rangle|^\iota) \cdot \|\boldsymbol{\delta}\|_2^\iota \\ &\leq \frac{m f_u^\iota n_u^\iota r^\iota}{C_r^\iota} (2\iota)! a_0^{2\iota} \\ &\leq \frac{\iota!}{2} \cdot \frac{m f_u^2 n_u^2 r^2 4! a_0^4}{C_r^2} \left[ \frac{f_u n_u r a_0^2}{C_r} \left( \frac{(2\iota)!}{12\iota!} \right)^{1/(\iota-2)} \right]^{\iota-2}. \end{aligned}$$



Applying Bernstein's inequality [1], we obtain that with probability at least  $1 - e^{-\gamma}$ ,

$$\begin{aligned} & \sup_{\boldsymbol{\delta} \in \mathbb{B}^p(r)} \max_{\mathbf{u} \in \mathcal{N}_\varepsilon} \left\langle \mathbf{u}, \frac{1}{m} \sum_{i \in \mathcal{I}_l} \left\{ \mathbf{z}_i^T \boldsymbol{\Omega}_i \boldsymbol{\Lambda}_i(\boldsymbol{\beta}) \mathbf{z}_i - E \left[ \mathbf{z}_i^T \boldsymbol{\Omega}_i \boldsymbol{\Lambda}_i(\boldsymbol{\beta}) \mathbf{z}_i \right] \right\} \boldsymbol{\delta} \right\rangle \\ & \leq \frac{f_u n_u a_0^2 r}{C_r} \left[ 4 \sqrt{\frac{3\gamma}{m}} + \left( \frac{(2\ell)!}{12\ell!} \right)^{1/(\ell-2)} \frac{\gamma}{m} \right] \lesssim C_r \left( \sqrt{\frac{\gamma}{m}} + \frac{\gamma}{m} \right). \end{aligned}$$

Following the proof of Lemma 4, after choosing an appropriate  $\varepsilon$ , we can conclude that

$$\sup_{\boldsymbol{\beta} \in \mathbb{B}_{\boldsymbol{\Sigma}}(r)} \left\| \boldsymbol{\Sigma}^{-1/2} \left[ \mathbf{D}_{m,l}(\boldsymbol{\beta}) - \mathbf{H}_{m,l}(\boldsymbol{\beta}) \right] (\boldsymbol{\beta} - \boldsymbol{\beta}_\tau) \right\|_2 \lesssim C_6 r \sqrt{\frac{p+\gamma}{m}}$$

holds with probability at least  $1 - e^{-\gamma}$ , where  $C_6 > 0$  is a constant depending on  $(\tau, n_u, f_u, a_1, \xi_{\min})$ .  $\blacksquare$

**Lemma 8.** Assume that Conditions (A1)–(A4) and (A6) hold. For any  $\varepsilon > 0$ , there exist constants  $C_\varepsilon, M_0 > 0$  such that for every  $M \geq M_0$ ,

$$\sup_{\boldsymbol{\beta} \in \mathbb{B}_{\boldsymbol{\Sigma}}(r)} \left\| \boldsymbol{\Sigma}_{m,l}(\boldsymbol{\beta}) \right\|_2 = \sup_{\boldsymbol{\beta} \in \mathbb{B}_{\boldsymbol{\Sigma}}(r)} \left\| \boldsymbol{\Sigma}^{-1/2} \left[ \widehat{\mathbf{D}}_{m,l}(\boldsymbol{\beta}) - \mathbf{D}_{m,l}(\boldsymbol{\beta}) \right] (\boldsymbol{\beta} - \boldsymbol{\beta}_\tau) \right\|_2 \leq C_7 C_\varepsilon \frac{r}{h_l} \sqrt{\frac{p^3}{M}}$$

holds with probability at least  $1 - \varepsilon$ , where  $C_7 = \tau^{-1}(1 - \tau)^{-1} \xi_p^{-1} \kappa_u n_u B^2$ .

*Proof.* Under Conditions (A1)–(A4) and (A6),

$$\begin{aligned} & \sup_{\boldsymbol{\beta} \in \mathbb{B}_{\boldsymbol{\Sigma}}(r)} \left\| \boldsymbol{\Sigma}^{-1/2} \left[ \widehat{\mathbf{D}}_{m,l}(\boldsymbol{\beta}) - \mathbf{D}_{m,l}(\boldsymbol{\beta}) \right] (\boldsymbol{\beta} - \boldsymbol{\beta}_\tau) \right\|_2 \\ & = \sup_{\boldsymbol{\delta} \in \mathbb{B}^p(r)} \sup_{\mathbf{u} \in \mathbb{S}^{p-1}} \left| \frac{1}{m} \sum_{i \in \mathcal{I}_l} \mathbf{u}^T \mathbf{z}_i^T \mathbf{A}_i^{-1/2} \left[ \widehat{\mathbf{R}}_i^{-1} - \mathbf{R}_i^{-1} \right] \mathbf{A}_i^{-1/2} \boldsymbol{\Lambda}_i(\boldsymbol{\beta}) \mathbf{z}_i \boldsymbol{\delta} \right| \\ & \leq \frac{1}{m} \sum_{i \in \mathcal{I}_l} \frac{1}{\tau(1 - \tau)} \sup_{\boldsymbol{\delta} \in \mathbb{B}^p(r)} \sup_{\mathbf{u} \in \mathbb{S}^{p-1}} \left| \mathbf{u}^T \mathbf{z}_i^T \left[ \widehat{\mathbf{R}}_i^{-1} - \mathbf{R}_i^{-1} \right] \text{diag} \left( \left\{ \frac{1}{h_l} k \left( -\frac{y_{ik} - \mathbf{x}_{ik}^T \boldsymbol{\beta}}{h_l} \right) \right\}_{k=1}^{n_i} \right) \mathbf{z}_i \boldsymbol{\delta} \right| \\ & \leq \frac{1}{\tau(1 - \tau)} \frac{1}{m} \sum_{i \in \mathcal{I}_l} \sup_{\boldsymbol{\delta} \in \mathbb{B}^p(r)} \sup_{\mathbf{u} \in \mathbb{S}^{p-1}} \left\{ \|\mathbf{z}_i \mathbf{u}\|_2 \cdot \left\| \widehat{\mathbf{R}}_i^{-1} - \mathbf{R}_i^{-1} \right\|_2 \cdot \frac{\kappa_u}{h_l} \cdot \|\mathbf{z}_i \boldsymbol{\delta}\|_2 \right\} \\ & \leq \frac{\kappa_u C_\varepsilon}{\tau(1 - \tau) h_l} \sqrt{\frac{p}{M}} \cdot \frac{1}{m} \sum_{i \in \mathcal{I}_l} \sup_{\boldsymbol{\delta} \in \mathbb{B}^p(r)} \sup_{\mathbf{u} \in \mathbb{S}^{p-1}} (\|\mathbf{z}_i \mathbf{u}\|_2 \cdot \|\mathbf{z}_i \boldsymbol{\delta}\|_2) \\ & \leq \frac{\kappa_u C_\varepsilon}{\tau(1 - \tau) h_l} \sqrt{\frac{p}{M}} \cdot \frac{1}{m} \sum_{i \in \mathcal{I}_l} \sup_{\boldsymbol{\delta} \in \mathbb{B}^p(r)} (\|\mathbf{z}_i\|_2^2 \cdot \|\boldsymbol{\delta}\|_2) \\ & \leq \frac{\kappa_u C_\varepsilon r}{\tau(1 - \tau) h_l} \sqrt{\frac{p}{M}} \cdot \frac{1}{m} \sum_{i \in \mathcal{I}_l} \|\mathbf{z}_i\|_2^2 = \frac{\kappa_u C_\varepsilon r}{\tau(1 - \tau) h} \sqrt{\frac{p}{M}} \cdot \frac{1}{m} \sum_{i \in \mathcal{I}_l} \left\| \boldsymbol{\Sigma}^{-1/2} \mathbf{x}_i \right\|_2^2 \\ & \leq \frac{\kappa_u C_\varepsilon r}{\tau(1 - \tau) h_l} \sqrt{\frac{p}{M}} \cdot \frac{1}{m} \sum_{i \in \mathcal{I}_l} \left\| \boldsymbol{\Sigma}^{-1/2} \right\|_2^2 \cdot \|\mathbf{x}_i\|_2^2 \leq \frac{\kappa_u C_\varepsilon r}{\tau(1 - \tau) \xi_p h_l} \sqrt{\frac{p}{M}} \cdot \frac{1}{m} \sum_{i \in \mathcal{I}_l} \|\mathbf{x}_i\|_2^2 \\ & \leq \frac{\kappa_u C_\varepsilon r}{\tau(1 - \tau) \xi_p h_l} \sqrt{\frac{p}{M}} \cdot n_u p B^2 \\ & = \frac{\kappa_u n_u B^2 C_\varepsilon r}{\tau(1 - \tau) \xi_p h_l} \sqrt{\frac{p^3}{M}} = C_6 C_\varepsilon \frac{r}{h_l} \sqrt{\frac{p^3}{M}}. \end{aligned}$$

holds with probability at least  $1 - \varepsilon$ .  $\blacksquare$

**Lemma 9.** For any  $\gamma > 0$ ,  $0 < r < h_l/(4\iota_{0.25})$  and  $s \geq 0$ , there exists  $f_{l,l} \geq 0$  such that

$$\begin{aligned} & \inf_{\beta \in \mathbb{B}_{\Sigma}(r) \cap \mathbb{C}_{\Sigma}(d)} \frac{\bar{D}_{\tilde{\mathcal{L}}_{M,l}}^{(s)}(\beta, \beta_{\tau})}{\kappa_* C_m^{-1} \|\beta - \beta_{\tau}\|_{\Sigma}^2} \\ & \geq \frac{3n_l}{4} f_{l,l} - f_{u,l}^{1/2} n_u \left[ 5B \sqrt{\frac{2dh_l \log(2p)}{r^2 m}} - 3\sqrt{\frac{2\gamma m_4}{h_l m}} \right] - \frac{13\gamma h_l n_u}{48r^2 m} \end{aligned}$$

holds with probability at least  $1 - e^{-\gamma}$ .

*Proof.* Define the parameter set  $\mathcal{B}_0(r_1, r_2) = \{\zeta \in \mathbb{R}^p : \|\zeta\|_1 \leq r_1, \|\zeta\|_{\Sigma} \leq r_2\}$  for  $r_1, r_2 > 0$ . Let  $\zeta = \beta - \beta_{\tau} \in \mathcal{B}_0(4d^{1/2}r, r)$  for  $\beta \in \mathbb{B}_{\Sigma}(r) \cap \mathbb{C}_{\Sigma}(d)$ . From the proof of Lemma 1, it's sufficient to derive the upper bound of

$$\begin{aligned} & E \left\{ \sup_{\zeta \in \mathcal{B}_0(4d^{1/2}r, r)} \left[ \frac{1}{m} \sum_{i \in \mathcal{I}_l} Z_i \left( \sum_{k=1}^{n_i} \langle \varsigma_{ik} \mathbf{x}_{ik}, \zeta / \|\zeta\|_{\Sigma} \rangle \right) \right] \right\} \\ & \leq 4d^{1/2} E \left\| \frac{1}{m} \sum_{i \in \mathcal{I}_l} Z_i \left( \sum_{k=1}^{n_i} \varsigma_{ik} \mathbf{x}_{ik} \right) \right\|_{\infty} = 4d^{1/2} E \left\{ E_Z \left\| \frac{1}{m} \sum_{i \in \mathcal{I}_l} Z_i \left( \sum_{k=1}^{n_i} \varsigma_{ik} \mathbf{x}_{ik} \right) \right\|_{\infty} \right\}, \end{aligned}$$

where  $E_Z$  stands for the (conditional) expectation over  $Z_1, \dots, Z_M$  given all the remaining random variables. Based on the Hoeffding's moment inequality, we have

$$\begin{aligned} E_Z \left\| \frac{1}{m} \sum_{i \in \mathcal{I}_l} Z_i \left( \sum_{k=1}^{n_i} \varsigma_{ik} \mathbf{x}_{ik} \right) \right\|_{\infty} & \leq \max_{1 \leq j \leq p} \left\{ \frac{1}{m} \sum_{i \in \mathcal{I}_l} \left( \sum_{k=1}^{n_i} \varsigma_{ik} x_{ik,j} \right)^2 \right\}^{1/2} \sqrt{\frac{2 \log(2p)}{m}} \\ & \leq \max_{1 \leq j \leq p} \left( \frac{n_u}{m} \sum_{i \in \mathcal{I}_l} \sum_{k=1}^{n_i} \varsigma_{ik}^2 x_{ik,j}^2 \right)^{1/2} \sqrt{\frac{2 \log(2p)}{m}} \\ & \leq \left( \frac{n_u}{m} \sum_{i \in \mathcal{I}_l} \sum_{k=1}^{n_i} \varsigma_{ik} \right)^{1/2} B \sqrt{\frac{2 \log(2p)}{m}}. \end{aligned}$$

Since  $E(\varsigma_{ik} | \mathbf{x}_{ik}) \leq f_{u,l} h_l$ , we have

$$E \left\{ \sup_{\zeta \in \mathcal{B}_0(4d^{1/2}r, r)} \left[ \frac{1}{m} \sum_{i \in \mathcal{I}_l} Z_i \left( \sum_{k=1}^{n_i} \langle \varsigma_{ik} \mathbf{x}_{ik}, \zeta / \|\zeta\|_{\Sigma} \rangle \right) \right] \right\} \leq 4n_u f_{u,l}^{1/2} B \sqrt{\frac{2dh_l \log(2p)}{m}}.$$

After using the similar arguments in the rest proof as that in the proof of Lemma 1, we obtained the claimed bound.  $\blacksquare$

**Lemma 10.** Assume that Conditions (A1)–(A7) hold. For any  $\gamma > 0$  and  $r > 0$ ,

$$\begin{aligned} \Xi_M(r) & = \sup_{\beta \in \mathbb{B}_{\Sigma}(r) \cap \mathbb{C}_{\Sigma}(d)} \left\| \wp_M(\beta) - E[\wp_M(\beta)] \right\|_{\infty} \\ & \leq \left[ \frac{c_3}{h} \sqrt{\frac{2d \log(2p)}{M}} + c_4 \sqrt{\frac{\log(2p) + \gamma}{Mh}} + c_5 d^{1/2} \frac{\log(2p) + \gamma}{Mh} \right] \cdot r \end{aligned}$$

holds with probability at least  $1 - e^{-\gamma}$ , where  $c_3 = 20 C_r^{-1} n_u \kappa_u B^2$ ,  $c_4 = C_r^{-1} (2\kappa_u f_u \sigma_u)^{1/2} \mu_4^{1/4} n_u$  with  $\sigma_u = \max_{1 \leq j \leq p} \sigma_{jj}$ , and  $c_5 = (52/3) C_r^{-1} n_u \kappa_u B^2$ .

*Proof.* Note that  $\mathbf{x}_{ik}^T \boldsymbol{\beta} - y_{ik} = \mathbf{x}_{ik}^T \boldsymbol{\zeta} - \epsilon_{ik}$ , where  $\epsilon_{ik} = y_{ik} - \mathbf{x}_{ik}^T \boldsymbol{\beta}_\tau$ . Write  $\mathbf{x}_{i,j} = (x_{i1,j}, \dots, x_{in_i,j})^T$ , we have

$$\begin{aligned} & \sup_{\boldsymbol{\beta} \in \mathcal{B}(r_1, r_2)} \left\| \wp_M(\boldsymbol{\beta}) - E[\wp_M(\boldsymbol{\beta})] \right\|_\infty \\ &= \max_{1 \leq j \leq p} \sup_{\boldsymbol{\zeta} \in \mathcal{B}_0(r_1, r_2)} \left| \frac{1}{M} \sum_{i=1}^M (1 - \mathbb{E}) \left\{ \mathbf{x}_{i,j}^T \boldsymbol{\Omega}_i \left[ \mathbf{K} \left( \frac{\mathbf{x}_i \boldsymbol{\zeta} - \boldsymbol{\epsilon}_i}{h} \right) - \mathbf{K} \left( \frac{-\boldsymbol{\epsilon}_i}{h} \right) \right] \right\} \right| \\ &\triangleq \max_{1 \leq j \leq p} \sup_{\boldsymbol{\zeta} \in \mathcal{B}_0(r_1, r_2)} \left| \frac{1}{M} \sum_{i=1}^M (1 - \mathbb{E}) \psi_{i,j}(\boldsymbol{\zeta}) \right| \\ &\triangleq \max_{1 \leq j \leq p} \mathcal{Y}_{M,j}, \end{aligned}$$

where  $\mathcal{B}(r_1, r_2) = \{\boldsymbol{\beta} \in \mathbb{R}^p : \|\boldsymbol{\beta} - \boldsymbol{\beta}_\tau\|_1 \leq r_1, \|\boldsymbol{\beta} - \boldsymbol{\beta}_\tau\|_\Sigma \leq r_2\}$ ,  $(1 - \mathbb{E})\psi(\cdot) = \psi(\cdot) - E[\psi(\cdot)]$ ,  $\mathbf{K}((\mathbf{x}_i \boldsymbol{\zeta} - \boldsymbol{\epsilon}_i)/h) = (K((\mathbf{x}_{i1}^T \boldsymbol{\zeta} - \epsilon_{i1})/h), \dots, K((\mathbf{x}_{in_i}^T \boldsymbol{\zeta} - \epsilon_{in_i})/h))^T$ , and  $\mathbf{K}(-\boldsymbol{\epsilon}_i/h) = (K(-\epsilon_{i1}/h), \dots, K(-\epsilon_{in_i}/h))^T$ . At follows, we derive the upper bound of  $\mathcal{Y}_{M,j}$ .

Since  $k(\cdot) = K'(\cdot)$  is uniformly bounded, we have

$$\left| K \left( \frac{\mathbf{x}_{ik}^T \boldsymbol{\zeta} - \epsilon_{ik}}{h} \right) - K \left( \frac{-\epsilon_{ik}}{h} \right) \right| \leq \frac{\kappa_u}{h} |\mathbf{x}_{ik}^T \boldsymbol{\zeta}|.$$

Therefore, for  $\boldsymbol{\zeta} \in \mathcal{B}_0(r_1, r_2)$ , we have

$$\begin{aligned} \sup_{\boldsymbol{\zeta} \in \mathcal{B}_0(r_1, r_2)} |\psi_{i,j}(\boldsymbol{\zeta})| &\leq \sup_{\boldsymbol{\zeta} \in \mathcal{B}_0(r_1, r_2)} \left\{ \|\mathbf{x}_{i,j}\|_2 \cdot \|\boldsymbol{\Omega}_i\|_2 \cdot \left\| \mathbf{K} \left( \frac{\mathbf{x}_i \boldsymbol{\zeta} - \boldsymbol{\epsilon}_i}{h} \right) - \mathbf{K} \left( \frac{-\boldsymbol{\epsilon}_i}{h} \right) \right\|_2 \right\} \\ &\leq \sup_{\boldsymbol{\zeta} \in \mathcal{B}_0(r_1, r_2)} \left\{ \|\mathbf{x}_{i,j}\|_2 \cdot \|\boldsymbol{\Omega}_i\|_2 \cdot \sqrt{n_i} \frac{\kappa_u}{h} \cdot \|\mathbf{x}_{ik}\|_\infty \|\boldsymbol{\zeta}\|_1 \right\} \\ &\leq \sqrt{n_i} \max_{1 \leq k \leq n_i} |x_{ik,j}| \cdot \frac{1}{C_r} \cdot \sqrt{n_i} \frac{\kappa_u}{h} \cdot \max_{1 \leq j \leq p} |x_{ik,j}| r_1 \\ &\leq \frac{n_u \kappa_u B^2 r_1}{C_r h} \end{aligned}$$

and

$$\begin{aligned} \varsigma_{ik}(\boldsymbol{\zeta}) &= E_{\epsilon_{ik}|\mathbf{x}_{ik}} \left[ K \left( \frac{\mathbf{x}_{ik}^T \boldsymbol{\zeta} - \epsilon_{ik}}{h} \right) - K \left( \frac{-\epsilon_{ik}}{h} \right) \right]^2 \\ &= \int_{-\infty}^{\infty} \left[ K \left( \frac{\mathbf{x}_{ik}^T \boldsymbol{\zeta} - u}{h} \right) - K \left( \frac{-u}{h} \right) \right]^2 f_{\epsilon_{ik}|\mathbf{x}_{ik}}(u) du \\ &= h \int_{-\infty}^{\infty} \left[ K \left( \frac{\mathbf{x}_{ik}^T \boldsymbol{\zeta}}{h} + v \right) - K(v) \right]^2 f_{\epsilon_{ik}|\mathbf{x}_{ik}}(-vh) dv \\ &= \frac{1}{h} (\mathbf{x}_{ik}^T \boldsymbol{\zeta})^2 \int_{-\infty}^{\infty} \left[ \int_0^1 k \left( v + \frac{w \mathbf{x}_{ik}^T \boldsymbol{\zeta}}{h} \right) dw \right]^2 f_{\epsilon_{ik}|\mathbf{x}_{ik}}(-vh) dv \\ &\leq \frac{f_u}{h} (\mathbf{x}_{ik}^T \boldsymbol{\zeta})^2 \int_{-\infty}^{\infty} \left[ \int_0^1 k \left( v + \frac{w \mathbf{x}_{ik}^T \boldsymbol{\zeta}}{h} \right) dw \right]^2 dv \\ &\leq \frac{f_u}{h} (\mathbf{x}_{ik}^T \boldsymbol{\zeta})^2 \left\{ \int_0^1 \left[ \int_{-\infty}^{\infty} k^2 \left( v + \frac{w \mathbf{x}_{ik}^T \boldsymbol{\zeta}}{h} \right) dv \right]^{1/2} dw \right\}^2 \\ &\leq \frac{f_u}{h} (\mathbf{x}_{ik}^T \boldsymbol{\zeta})^2 \kappa_u. \end{aligned}$$

Denote  $\mathbf{K}_i(\boldsymbol{\beta}) = \mathbf{K}((\mathbf{x}_i\boldsymbol{\zeta} - \boldsymbol{\epsilon}_i)/h)$  and  $\mathbf{K}_i(\boldsymbol{\beta}_\tau) = \mathbf{K}(-\boldsymbol{\epsilon}_i/h)$  for the sake of notation, we have

$$\begin{aligned}
E[\psi_{i,j}^2(\boldsymbol{\zeta})] &= E\left[\mathbf{x}_{i,j}^\top \boldsymbol{\Omega}_i(\boldsymbol{\alpha}) (\mathbf{K}_i(\boldsymbol{\beta}) - \mathbf{K}_i(\boldsymbol{\beta}_\tau)) (\mathbf{K}_i(\boldsymbol{\beta}) - \mathbf{K}_i(\boldsymbol{\beta}_\tau))^\top \boldsymbol{\Omega}_i(\boldsymbol{\alpha}) \mathbf{x}_{i,j}\right] \\
&= E_{\mathbf{x}_i} \left\{ \mathbf{x}_{i,j}^\top \boldsymbol{\Omega}_i(\boldsymbol{\alpha}) E_{\boldsymbol{\epsilon}_i|\mathbf{x}_i} [(\mathbf{K}_i(\boldsymbol{\beta}) - \mathbf{K}_i(\boldsymbol{\beta}_\tau)) (\mathbf{K}_i(\boldsymbol{\beta}) - \mathbf{K}_i(\boldsymbol{\beta}_\tau))^\top] \boldsymbol{\Omega}_i(\boldsymbol{\alpha}) \mathbf{x}_{i,j} \right\} \\
&\leq E_{\mathbf{x}_i} \left\{ \mathbf{x}_{i,j}^\top \boldsymbol{\Omega}_i(\boldsymbol{\alpha}) E_{\boldsymbol{\epsilon}_i|\mathbf{x}_i} [(\mathbf{K}_i(\boldsymbol{\beta}) - \mathbf{K}_i(\boldsymbol{\beta}_\tau))^\top (\mathbf{K}_i(\boldsymbol{\beta}) - \mathbf{K}_i(\boldsymbol{\beta}_\tau))] \mathbf{I}_{n_i} \boldsymbol{\Omega}_i(\boldsymbol{\alpha}) \mathbf{x}_{i,j} \right\} \\
&\leq \frac{1}{C_r^2} E_{\mathbf{x}_i} \left[ \mathbf{x}_{i,j}^\top \mathbf{x}_{i,j} \sum_{k=1}^{n_i} \varsigma_{ik}(\boldsymbol{\zeta}) \right] \leq \frac{f_u \kappa_u}{h C_r^2} E_{\mathbf{x}_i} \left[ \mathbf{x}_{i,j}^\top \mathbf{x}_{i,j} \sum_{k=1}^{n_i} (\mathbf{x}_{ik}^\top \boldsymbol{\zeta})^2 \right] \\
&= \frac{f_u \kappa_u}{h C_r^2} E_{\mathbf{x}_i} [\mathbf{x}_{i,j}^\top \mathbf{x}_{i,j} \cdot \boldsymbol{\zeta}^\top \mathbf{x}_i^\top \mathbf{x}_i \boldsymbol{\zeta}] \leq \frac{f_u \kappa_u}{h C_r^2} [E(\mathbf{x}_{i,j}^\top \mathbf{x}_{i,j})^2]^{1/2} [E(\boldsymbol{\zeta}^\top \mathbf{x}_i^\top \mathbf{x}_i \boldsymbol{\zeta})^2]^{1/2} \\
&\leq \frac{f_u \kappa_u n_u^2 \mu_4^{1/2} \sigma_{jj} r_2^2}{h C_r^2}, \tag{32}
\end{aligned}$$

where  $E(\mathbf{x}_{i,j}^\top \mathbf{x}_{i,j})^2 = E\|\mathbf{z}_i \boldsymbol{\Sigma}^{1/2} \mathbf{e}_j\|_2^4 \leq n_u^2 \mu_4 \|\boldsymbol{\Sigma}^{1/2} \mathbf{e}_j\|_2^4 = n_u^2 \mu_4 \sigma_{jj}^2$  with the  $j$ -th diagonal element  $\sigma_{jj}$  of  $\boldsymbol{\Sigma}$ , and  $E(\boldsymbol{\zeta}^\top \mathbf{x}_i^\top \mathbf{x}_i \boldsymbol{\zeta})^2 \leq n_u^2 \|\boldsymbol{\Sigma}^{1/2} \boldsymbol{\zeta}\|_2^4 \leq n_u^2 r_2^4$ .

According to the Bousquet's version of Talagrand's inequality in Bousquet (2003) [2], for any  $\gamma > 0$ , we have

$$\Upsilon_{M,j} \leq \frac{5}{4} E(\Upsilon_{M,j}) + \frac{f_u^{1/2} \mu_4^{1/4} \sigma_{jj}^{1/2} \kappa_u^{1/2} n_u r_2}{C_r} \sqrt{\frac{2\gamma}{Mh}} + \left(4 + \frac{1}{3}\right) \frac{n_u \kappa_u B^2 r_1 \gamma}{C_r M h} \tag{33}$$

with probability at least  $1 - e^{-\gamma}$ .

At follows, we derive the upper bound of  $E(\Upsilon_{M,j})$ . Let  $Z_1, \dots, Z_M$  be i.i.d. Rademacher random variables. Based on the Rademacher symmetrization,

$$\begin{aligned}
E(\Upsilon_{M,j}) &\leq 2E \left\{ \sup_{\boldsymbol{\zeta} \in \mathcal{B}_0(r_1, r_2)} \left| \frac{1}{M} \sum_{i=1}^M Z_i \psi_{i,j}(\boldsymbol{\zeta}) \right| \right\} \\
&= 2E \left\{ E_Z \left[ \sup_{\boldsymbol{\zeta} \in \mathcal{B}_0(r_1, r_2)} \left| \frac{1}{M} \sum_{i=1}^M Z_i \psi_{i,j}(\boldsymbol{\zeta}) \right| \right] \right\}, \tag{34}
\end{aligned}$$

where the expectation  $E_Z$  is taken with respect to  $Z_1, \dots, Z_M$ . Write  $\psi_{ij}(\boldsymbol{\zeta}) = \mathbf{x}_{i,j}^\top \boldsymbol{\Omega}_i \boldsymbol{\varphi}_i(\mathbf{x}_i \boldsymbol{\zeta})$  with  $\boldsymbol{\varphi}_i(\mathbf{x}_i \boldsymbol{\zeta}) = (\varphi_{i1}(\mathbf{x}_{i1}^\top \boldsymbol{\zeta}), \dots, \varphi_{in_i}(\mathbf{x}_{in_i}^\top \boldsymbol{\zeta}))^\top$ , where  $\varphi_{ik}(\cdot)$  satisfies  $\varphi_{ik}(0) = 0$  and  $|\varphi_{ik}(u) - \varphi_{ik}(v)| \leq \kappa_u h^{-1} |u - v|$ . According to the Talagrand's contraction principle in Ledoux and Talagrand (1991) [5], we have

$$\begin{aligned}
&E_Z \left\{ \sup_{\boldsymbol{\zeta} \in \mathcal{B}_0(r_1, r_2)} \left| \frac{1}{M} \sum_{i=1}^M Z_i \psi_{i,j}(\boldsymbol{\zeta}) \right| \right\} \\
&= E_Z \left\{ \sup_{\boldsymbol{\zeta} \in \mathcal{B}_0(r_1, r_2)} \left| \frac{1}{M} \sum_{i=1}^M Z_i [\mathbf{x}_{i,j}^\top \boldsymbol{\Omega}_i \boldsymbol{\varphi}_i(\mathbf{x}_i \boldsymbol{\zeta})] \right| \right\} \\
&\leq \frac{2\kappa_u}{C_r h} \max_{1 \leq i \leq M, 1 \leq k \leq n_i} |x_{ik,j}| \cdot E_Z \left\{ \sup_{\boldsymbol{\zeta} \in \mathcal{B}_0(r_1, r_2)} \left| \frac{1}{M} \sum_{i=1}^M Z_i \left( \sum_{k=1}^{n_i} \mathbf{x}_{ik}^\top \boldsymbol{\zeta} \right) \right| \right\} \\
&\leq \frac{2\kappa_u B r_1}{C_r h} E_Z \left\| \frac{1}{M} \sum_{i=1}^M Z_i \left( \sum_{k=1}^{n_i} \mathbf{x}_{ik} \right) \right\|_\infty. \tag{35}
\end{aligned}$$

Based on the Hoeffding's moment inequality,

$$\begin{aligned} E_Z \left\| \frac{1}{M} \sum_{i=1}^M Z_i \left( \sum_{k=1}^{n_i} \mathbf{x}_{ik} \right) \right\|_{\infty} &\leq \max_{1 \leq j \leq p} \left( \frac{1}{M} \sum_{i=1}^M \left( \sum_{k=1}^{n_i} x_{ik,j} \right)^2 \right)^{1/2} \sqrt{\frac{2 \log(2p)}{M}} \\ &\leq \max_{1 \leq j \leq p} \left( \frac{n_u^2}{M} \sum_{i=1}^M \left( \frac{1}{n_i} \sum_{k=1}^{n_i} x_{ik,j}^2 \right) \right)^{1/2} \sqrt{\frac{2 \log(2p)}{M}}. \end{aligned} \quad (36)$$

Together with (34)–(36), for any  $j = 1, \dots, p$ ,

$$E(\Upsilon_{M,j}) \leq \frac{4n_u \kappa_u B^2 r_1}{C_r h} \sqrt{\frac{2 \log(2p)}{M}}. \quad (37)$$

Take  $r_1 = 4d^{1/2}r$ ,  $r_2 = r$ , and  $\gamma' = \log(2p) + \gamma$ . Combine with (32), (33), and (37), we have the claimed bound.  $\blacksquare$

### 3 Proofs of Main Results

#### 3.1 Proof of Theorem 1

**Theorem 1** (Restatement of Theorem 1 from main text). *Assume that Conditions (A1)–(A7) hold. Let  $r_0 \gtrsim r_* > 0$ . For any  $\gamma, \varepsilon > 0$ , suppose the bandwidths  $h_l \geq h > 0$  satisfy  $\max(r_0, \sqrt{(p+\gamma)/m}) \lesssim h_l \lesssim 1$  and  $\sqrt{(p+\gamma)/M} \lesssim h$ . Then, conditioned on the event  $\mathcal{E}_0(r_0) \cap \mathcal{E}_*(\bar{r}_*) \cap \mathcal{E}_*(\tilde{r}_*)$ , there exist constants  $C_\varepsilon, M_0 > 0$  such that for all  $M \geq M_0$ , the one-step distributed estimator  $\hat{\beta}_l^{(1)}$  computed on the  $l$ -th machine satisfies*

$$\|\hat{\beta}_l^{(1)} - \beta_\tau\|_{\Sigma} \lesssim C \left( \sqrt{\frac{p+\gamma}{Mh}} + \sqrt{\frac{p+\gamma}{m}} + \frac{C_\varepsilon}{h_l} \sqrt{\frac{p^3}{M}} + h_l + 1 - L^{-1} \right) \cdot r_0 + r_*$$

with probability at least  $1 - 3e^{-\gamma} - \varepsilon$ , where  $C > 0$  is a constant depending on  $(\tau, n_u, f_u, \kappa_u, \mu_3, a_1, L_0, B, \xi_p, \xi_{\min})$ .

*Proof.* Assume the event  $\mathcal{E}_0(r_0) = \{\hat{\beta}^{(0)} \in \mathbb{B}_{\Sigma}(r_0)\}$  holds. Set  $r_{\text{loc}} = h_l/(4\iota_{0.25})$ . Let  $\hat{\beta} = \hat{\beta}_l^{(1)}$  be the one-step estimator that minimizes  $\tilde{\mathcal{L}}_{M,l}^{(0)}(\beta)$  with respect to  $\beta$  on the  $l$ th machine. Define an intermediate estimator  $\hat{\beta}_v = \beta_\tau + v(\hat{\beta} - \beta_\tau)$ , where  $v = \sup\{u \in [0, 1] : \beta_\tau + u(\hat{\beta} - \beta_\tau) \in \mathbb{B}_{\Sigma}(r_{\text{loc}})\}$  is the largest value of  $u \in (0, 1]$  such that the convex combination of  $\beta_\tau$  and  $\hat{\beta}$ :  $(1-v)\beta_\tau + v\hat{\beta}$  falls into  $\mathbb{B}_{\Sigma}(r_0)$ . If  $\hat{\beta} \in \mathbb{B}_{\Sigma}(r_{\text{loc}})$ ,  $v = 1$ , and  $\hat{\beta}_v = \hat{\beta}$ ; otherwise, if  $\hat{\beta} \notin \mathbb{B}_{\Sigma}(r_{\text{loc}})$ ,  $v \in (0, 1)$ , and  $\hat{\beta}_v$  falls onto the boundary of  $\mathbb{B}_{\Sigma}(r_{\text{loc}})$ , that is,  $\hat{\beta}_v \in \partial\mathbb{B}_{\Sigma}(r_{\text{loc}}) = \{\beta \in \mathbb{R}^p : \|\beta - \beta_\tau\|_{\Sigma} = r_{\text{loc}}\}$ .

Based on Lemma F.2 in Fan et al. (2018) [3] and the first-order optimality condition  $\nabla \tilde{\mathcal{L}}_{M,l}^{(0)}(\hat{\beta}) = \mathbf{0}$ , we have

$$\begin{aligned} \bar{D}_{\tilde{\mathcal{L}}_{M,l}}^{(0)}(\hat{\beta}_v, \beta_\tau) &\leq v \bar{D}_{\tilde{\mathcal{L}}_{M,l}}^{(0)}(\hat{\beta}, \beta_\tau) = -v \left\langle \nabla \tilde{\mathcal{L}}_{M,l}^{(0)}(\beta_\tau), \hat{\beta} - \beta_\tau \right\rangle \\ &\leq \left\| \Sigma^{-1/2} \nabla \tilde{\mathcal{L}}_{M,l}^{(0)}(\beta_\tau) \right\|_2 \cdot \left\| \Sigma^{1/2}(\hat{\beta}_v - \beta_\tau) \right\|_2. \end{aligned} \quad (38)$$

Based on Lemma 2, given any  $\gamma > 0$ , as long as  $(p + \gamma)/m \lesssim h_l \lesssim 1$ ,

$$\bar{D}_{\tilde{\mathcal{L}}_{M,l}}^{(0)}(\beta, \beta_\tau) \geq 0.5 C_m^{-1} \kappa_* n_l f_{l,l} \cdot \|\beta - \beta_\tau\|_\Sigma^2 \quad (39)$$

holds uniformly over all  $\beta \in \mathbb{B}_\Sigma(r_{\text{loc}})$  with probability at least  $1 - e^{-\gamma}$ .

Note that  $\nabla \tilde{\mathcal{L}}_{M,l}^{(0)}(\beta) = \nabla \mathcal{L}_{m,l}^{(0)}(\beta) - \nabla \mathcal{L}_{m,l}^{(0)}(\hat{\beta}^{(0)}) + \nabla \mathcal{L}_M^{(0)}(\hat{\beta}^{(0)})$ . Since

$$\nabla \mathcal{L}_{m,l}^{(0)}(\beta_\tau) = \hat{U}_{m,l}(\hat{\beta}^{(0)}) - \hat{D}_{m,l}(\hat{\beta}^{(0)}) (\hat{\beta}^{(0)} - \beta_\tau).$$

We can decompose  $\nabla \tilde{\mathcal{L}}_{M,l}^{(0)}(\beta_\tau)$  as

$$\begin{aligned} \nabla \tilde{\mathcal{L}}_{M,l}^{(0)}(\beta_\tau) &= \hat{U}_M(\hat{\beta}^{(0)}) - \hat{D}_{m,l}(\hat{\beta}^{(0)}) (\hat{\beta}^{(0)} - \beta_\tau) \\ &= \hat{U}_M(\hat{\beta}^{(0)}) - U_M(\hat{\beta}^{(0)}) + U_M(\hat{\beta}^{(0)}) - U_M(\beta_\tau) + U_M(\beta_\tau) \\ &\quad - \hat{D}_{m,l}(\hat{\beta}^{(0)}) (\hat{\beta}^{(0)} - \beta_\tau) \\ &= \hat{U}_M(\hat{\beta}^{(0)}) - U_M(\hat{\beta}^{(0)}) \\ &\quad + U_M(\hat{\beta}^{(0)}) - U_M(\beta_\tau) - H_M(\beta_\tau) (\hat{\beta}^{(0)} - \beta_\tau) \\ &\quad + H_M(\beta_\tau) - H_M(\hat{\beta}^{(0)}) (\hat{\beta}^{(0)} - \beta_\tau) \\ &\quad + H_M(\hat{\beta}^{(0)}) - H_{m,l}(\hat{\beta}^{(0)}) (\hat{\beta}^{(0)} - \beta_\tau) \\ &\quad + H_{m,l}(\hat{\beta}^{(0)}) - D_{m,l}(\hat{\beta}^{(0)}) (\hat{\beta}^{(0)} - \beta_\tau) \\ &\quad + D_{m,l}(\hat{\beta}^{(0)}) - \hat{D}_{m,l}(\hat{\beta}^{(0)}) (\hat{\beta}^{(0)} - \beta_\tau) \\ &\quad + U_M(\beta_\tau). \end{aligned}$$

According to Lemmas 2-8, as long as  $h \gtrsim \sqrt{(p + \gamma)/M}$  and  $m \gtrsim p + \gamma$ ,

$$\begin{aligned} \left\| \Sigma^{-1/2} \nabla \tilde{\mathcal{L}}_{M,l}^{(0)}(\beta_\tau) \right\|_2 &\leq \left\| \mathfrak{G}_M(\hat{\beta}^{(0)}) \right\|_2 + \left\| \Delta_M(\hat{\beta}^{(0)}) \right\|_2 + \left\| \mathfrak{T}_M(\beta_\tau) \right\|_2 \\ &\quad + \left\| \mathfrak{F}_M(\hat{\beta}^{(0)}) \right\|_2 + \left\| \mathfrak{F}_{M,l}(\hat{\beta}^{(0)}) \right\|_2 \\ &\quad + \left\| \mathfrak{H}_{m,l}(\hat{\beta}^{(0)}) \right\|_2 + \left\| \mathfrak{E}_{m,l}(\hat{\beta}^{(0)}) \right\|_2 \\ &\lesssim \xi_p^{-1/2} C_0 C_\varepsilon \sqrt{\frac{p^2}{M}} + C_1 r \left( \sqrt{\frac{p + \gamma}{Mh}} + r \right) \\ &\quad + C_2 \left( \sqrt{\frac{p + \gamma}{M}} + h^2 \right) + C_3 r^2 + [C_4(1 - L^{-1}) + C_5|h_l - h|] r \\ &\quad + C_6 r \sqrt{\frac{p + \gamma}{m}} + C_7 C_\varepsilon \frac{r}{h_l} \sqrt{\frac{p^3}{M}} \end{aligned}$$

holds with probability at least  $1 - 3e^{-\gamma} - 2\varepsilon$ . Then, conditioned on the event  $\mathcal{E}_0(r_0) \cap \mathcal{E}_*(\bar{r}_*) \cap \mathcal{E}_*(\tilde{r}_*)$ , as long as  $h_l \geq h > 0$  and  $h_l \gtrsim r_0$ ,

$$\left\| \Sigma^{-1/2} \nabla \tilde{\mathcal{L}}_{M,l}^{(0)}(\beta_\tau) \right\|_2 \leq C \left( \sqrt{\frac{p + \gamma}{Mh}} + \sqrt{\frac{p + \gamma}{m}} + \frac{C_\varepsilon}{h_l} \sqrt{\frac{p^3}{M}} + h_l + 1 - L^{-1} \right) \cdot r_0 + r_*, \quad (40)$$

holds with probability at least  $1 - 2e^{-\gamma} - \varepsilon$ , where  $r_* = O_p(p/\sqrt{M} + h^2)$ .

Together with (38), (39), and (40), conditioned on the event  $\mathcal{E}_0(r_0) \cap \mathcal{E}_*(\bar{r}_*) \cap \mathcal{E}_*(\tilde{r}_*)$ ,

$$\begin{aligned} \left\| \hat{\beta}_v - \beta_\tau \right\|_{\Sigma} &\leq 2 C_m (\kappa_* n_l f_{l,l})^{-1} \left\| \Sigma^{-1/2} \nabla \tilde{\mathcal{L}}_{M,l}^{(0)}(\beta_\tau) \right\|_2 \\ &\leq 2 C_m (\kappa_* n_l f_{l,l})^{-1} \left\{ C \left( \sqrt{\frac{p+\gamma}{Mh}} + \sqrt{\frac{p+\gamma}{m}} + \frac{C_\varepsilon}{h_l} \sqrt{\frac{p^3}{M}} + h_l + 1 - L^{-1} \right) \cdot r_0 + r_* \right\} \end{aligned} \quad (41)$$

holds with probability at least  $1 - 3e^{-\gamma} - \varepsilon$ . Let the bandwidth  $h_l \geq h > 0$  satisfy  $1 \gtrsim h_l \gtrsim \max(r_0, r_*)$  and  $\sqrt{(p+\gamma)/(Mh)} + \sqrt{(p+\gamma)/m} + C_\varepsilon h_l^{-1} \sqrt{p^3/M} + h_l + 1 - L^{-1} \lesssim 1$ , so that the right hand side of (41) is strictly less than  $r_{\text{loc}}$ . Then, the intermediate estimator  $\hat{\beta}_v$  falls into the interior of the local region  $\mathbb{B}_{\Sigma}(r_{\text{loc}})$  with high probability conditioned on the event  $\mathcal{E}_0(r_0) \cap \mathcal{E}_*(\bar{r}_*) \cap \mathcal{E}_*(\tilde{r}_*)$ . Note that if  $\hat{\beta} \notin \mathbb{B}_{\Sigma}(r_{\text{loc}})$ ,  $\hat{\beta}_v$  lies on the boundary of  $\mathbb{B}_{\Sigma}(r_{\text{loc}})$ , which is a contradiction to (41). Therefore,  $\hat{\beta} = \hat{\beta}_v \in \mathbb{B}_{\Sigma}(r_{\text{loc}})$  and the bound (41) also applies to  $\hat{\beta}$ . ■

## 3.2 Proof of Theorem 2

**Theorem 2** (Restatement of Theorem 2 from main text). *Assume the conditions of Theorem 1 hold. For any  $\gamma, \varepsilon > 0$ , conditioned on the event  $\mathcal{E}_0(r_0) \cap \mathcal{E}_*(\bar{r}_*) \cap \mathcal{E}_*(\tilde{r}_*)$ , there exist constants  $C_\varepsilon, M_0 > 0$  such that for all  $M \geq M_0$ , the  $S$ -step distributed estimator  $\hat{\beta}_l^{(S)}$  computed on the  $l$ -th machine satisfies*

$$\left\| \hat{\beta}_l^{(S)} - \beta_\tau \right\|_{\Sigma} \lesssim \vartheta^S \cdot r_0 + r_* \lesssim r_*$$

with probability at least  $1 - (2S + 1)e^{-\gamma} - S\varepsilon$ , provided that  $\vartheta^{S-1} \cdot r_0 \lesssim r_*$ . Here,  $\vartheta = \vartheta(p, m, M, L, h_l, h, \gamma, C_\varepsilon) = C \left\{ \sqrt{(p+\gamma)/(Mh)} + \sqrt{(p+\gamma)/m} + C_\varepsilon h_l^{-1} \sqrt{p^3/M} + h_l + 1 - L^{-1} \right\}$ , and the number of iterations satisfies  $S \gtrsim \log(r_0/r_*)/\log(1/h_l)$ .

*Proof.* Given the  $s$ -step ( $s \geq 0$ ) estimator  $\hat{\beta}_l^{(s)}$  of  $\beta$  on the  $l$ th machine and denote  $\hat{\beta}_l^{(s)} = \hat{\beta}^{(s)}$ , we have

$$\begin{aligned} \Sigma^{-1/2} \nabla \tilde{\mathcal{L}}_{M,l}^{(s)}(\beta_\tau) &= \mathfrak{G}_M(\hat{\beta}^{(s)}) + \Delta_M(\hat{\beta}^{(s)}) - \mathfrak{F}_M(\hat{\beta}^{(s)}) \\ &\quad + \mathfrak{F}_{M,l}(\hat{\beta}^{(s)}) - \mathfrak{H}_{m,l}(\hat{\beta}^{(s)}) + \mathfrak{E}_{m,l}(\hat{\beta}^{(s)}) + \mathfrak{T}_M(\beta_\tau). \end{aligned}$$

Therefore,

$$\begin{aligned} \left\| \Sigma^{-1/2} \nabla \tilde{\mathcal{L}}_{M,l}^{(s)}(\beta_\tau) \right\|_2 &\leq \left\| \mathfrak{G}_M(\hat{\beta}^{(s)}) \right\|_2 + \left\| \Delta_M(\hat{\beta}^{(s)}) \right\|_2 + \left\| \mathfrak{F}_M(\hat{\beta}^{(s)}) \right\|_2 + \left\| \mathfrak{F}_{M,l}(\hat{\beta}^{(s)}) \right\|_2 \\ &\quad + \left\| \mathfrak{H}_{m,l}(\hat{\beta}^{(s)}) \right\|_2 + \left\| \mathfrak{E}_{m,l}(\hat{\beta}^{(s)}) \right\|_2 + \left\| \mathfrak{T}_M(\beta_\tau) \right\|_2. \end{aligned} \quad (42)$$

Define the “good” events for the sequence of iterates  $\{\hat{\beta}^{(s)}\}_{s=0}^S$ :

$$\mathcal{E}_s(r_s) = \left\{ \hat{\beta}^{(s)} \in \mathbb{B}_{\Sigma}(r_s) \right\}, \quad s = 0, 1, \dots, S,$$

where  $r_0 \geq r_1 \geq \dots \geq r_S > 0$  are some sequence of radius to be determined. Let  $r_{\text{loc}} = h_l/(4\gamma_{0.25})$  be the same local radius defined in the proof of Theorem 1. According to Lemma 1, as long as  $(p + \gamma)/m \lesssim h_l \lesssim 1$ ,

$$\bar{D}_{\tilde{\mathcal{L}}_{M,l}}^{(s)}(\beta, \beta_\tau) \geq 0.5 C_m^{-1} \kappa_* n_l f_{l,l} \cdot \|\beta - \beta_\tau\|_\Sigma^2 \quad (43)$$

holds uniformly over all  $\beta \in \mathbb{B}_\Sigma(r_{\text{loc}})$  with probability at least  $1 - e^{-\gamma}$ .

Let  $\hat{\beta}^{(s+1)} = \hat{\beta}_l^{(s+1)}$  be the update of  $\beta$  on the  $l$ th machine in the  $(s+1)$ th iteration. Define an intermediate estimator  $\hat{\beta}_v^{(s+1)} = \beta_\tau + v(\hat{\beta}^{(s+1)} - \beta_\tau)$  (a convex combination of  $\hat{\beta}^{(s+1)}$  and  $\beta_\tau$ ). Assume that  $\hat{\beta}_v^{(s)} \in \mathbb{B}_\Sigma(r_{\text{loc}})$ . Based on (38), (42), and (43), conditioned on the event  $\mathcal{E}_0(r_0) \cap \mathcal{E}_*(\bar{r}_*) \cap \mathcal{E}_*(\tilde{r}_*)$ ,

$$\begin{aligned} \left\| \hat{\beta}_v^{(s+1)} - \beta_\tau \right\|_\Sigma &\leq \bar{\kappa}^{-1} \left\| \Sigma^{-1/2} \nabla \tilde{\mathcal{L}}_{M,l}^{(s)}(\beta_\tau) \right\|_2 \\ &\leq \bar{\kappa}^{-1} \left( \left\| \mathfrak{S}_M(\hat{\beta}^{(s)}) \right\|_2 + \left\| \Delta_M(\hat{\beta}^{(s)}) \right\|_2 + \left\| \mathfrak{F}_M(\hat{\beta}^{(s)}) \right\|_2 \right. \\ &\quad \left. + \left\| \mathfrak{F}_{M,l}(\hat{\beta}^{(s)}) \right\|_2 + \left\| \mathfrak{H}_{m,l}(\hat{\beta}^{(s)}) \right\|_2 + \left\| \mathfrak{E}_{m,l}(\hat{\beta}^{(s)}) \right\|_2 + \left\| \mathfrak{T}_M(\beta_\tau) \right\|_2 \right) \\ &\leq \bar{\kappa}^{-1} \left( \left\| \Delta_M(\hat{\beta}^{(s)}) \right\|_2 + \left\| \mathfrak{F}_M(\hat{\beta}^{(s)}) \right\|_2 + \left\| \mathfrak{F}_{M,l}(\hat{\beta}^{(s)}) \right\|_2 \right. \\ &\quad \left. + \left\| \mathfrak{H}_{m,l}(\hat{\beta}^{(s)}) \right\|_2 + \left\| \mathfrak{E}_{m,l}(\hat{\beta}^{(s)}) \right\|_2 + r_* \right), \end{aligned} \quad (44)$$

where  $\bar{\kappa} = 0.5 C_m^{-1} \kappa_* n_l f_{l,l}$ . Define the event

$$\mathcal{F}(r) = \left\{ \sup_{\beta \in \mathbb{B}_\Sigma(r)} \left\{ \left\| \Delta_M(\beta) \right\|_2 + \left\| \mathfrak{F}_M(\beta) \right\|_2 + \left\| \mathfrak{F}_{M,l}(\beta) \right\|_2 \right. \right. \\ \left. \left. + \left\| \mathfrak{H}_{m,l}(\beta) \right\|_2 + \left\| \mathfrak{E}_{m,l}(\beta) \right\|_2 \right\} \leq \vartheta(\gamma) \cdot r \right\},$$

where  $\vartheta(\gamma) = C \{ \sqrt{(p + \gamma)/(Mh)} + \sqrt{(p + \gamma)/m} + C_\varepsilon h_l^{-1} \sqrt{p^3/M} + h_l + 1 - L^{-1} \}$  (for some  $C > 0$ ), such that  $\mathcal{F}(r)$  holds with probability at least  $1 - 2e^{-\gamma} - \varepsilon$  for  $0 < r \lesssim h_l$ .

Let  $\mathcal{E}_{\text{loc}}$  be the event where the local strong convexity in (43) holds. From (44), at the first iteration, conditioned on the event  $\mathcal{E}_0(r_0) \cap \mathcal{E}_*(\bar{r}_*) \cap \mathcal{E}_*(\tilde{r}_*) \cap \mathcal{E}_{\text{loc}} \cap \mathcal{F}(r_0)$ ,

$$\left\| \hat{\beta}_v^{(1)} - \beta_\tau \right\|_\Sigma \leq r_1 := \bar{\kappa}^{-1} \vartheta(\gamma) \cdot r_0 + \bar{\kappa}^{-1} r_*. \quad (45)$$

From the constraints on  $(h_l, h, r_0, r_*)$ , we have  $\bar{\kappa}^{-1} \vartheta(\gamma) < 1$ ,  $r_1 < r_{\text{loc}} \asymp h_l$ , and  $r_1 \leq r_0$ . This implies  $\hat{\beta}^{(1)} = \hat{\beta}_v^{(1)} \in \mathbb{B}_\Sigma(r_{\text{loc}})$ , which in turn certifies the event  $\mathcal{E}_1(r_1) = \{ \hat{\beta}^{(1)} \in \mathbb{B}_\Sigma(r_1) \}$ .

Next, we assume that for some  $s \geq 1$ ,  $\hat{\beta}^{(s)} \in \mathbb{B}_\Sigma(r_s)$ , where  $r_s := \bar{\kappa}^{-1} \vartheta(\gamma) \cdot r_{s-1} + \bar{\kappa}^{-1} r_* \leq r_{s-1}$  and  $r_s < r_{\text{loc}}$  for all  $s = 1, \dots, S$ . According to (44), at the  $(s+1)$ th-iteration, conditioned on the event  $\mathcal{E}_s(r_s) \cap \mathcal{E}_*(\bar{r}_*) \cap \mathcal{E}_*(\tilde{r}_*) \cap \mathcal{E}_{\text{loc}} \cap \mathcal{F}(r_s)$ ,

$$\left\| \hat{\beta}_v^{(s+1)} - \beta_\tau \right\|_\Sigma \leq r_{s+1} := \bar{\kappa}^{-1} \vartheta(\gamma) \cdot r_s + \bar{\kappa}^{-1} r_*. \quad (46)$$



Note that  $r_{s+1} \leq \bar{\kappa}^{-1}\vartheta(\gamma) \cdot r_{s-1} + \bar{\kappa}^{-1}r_* = r_s < r_{\text{loc}}$ . Therefore,  $\hat{\beta}_v^{(s+1)}$  falls into the interior of  $\mathbb{B}_{\Sigma}(r_{\text{loc}})$ , which implies  $\hat{\beta}^{(s+1)} = \hat{\beta}_v^{(s+1)} \in \mathbb{B}_{\Sigma}(r_{\text{loc}})$  and certifies the event  $\mathcal{E}_{s+1}(r_{s+1}) = \left\{ \hat{\beta}^{(s+1)} \in \mathbb{B}_{\Sigma}(r_{s+1}) \right\}$ . Consequently,  $\hat{\beta}^{(s+1)} \in \mathbb{B}_{\Sigma}(r_{s+1}) \subset \mathbb{B}_{\Sigma}(r_s)$  and the bound (46) also applies to  $\hat{\beta}^{(s+1)}$  with  $r_{s+1} \leq r_s$ .

Repeat the above arguments until  $s = S \geq 1$ . Since for every  $1 \leq s \leq S$ ,  $\mathcal{E}_s(r_s)$  holds under the event  $\mathcal{E}_{s-1}(r_{s-1}) \cap \mathcal{E}_*(\bar{r}_*) \cap \mathcal{E}_*(\tilde{r}_*) \cap \mathcal{E}_{\text{loc}} \cap \mathcal{F}(r_{s-1})$ . Conditioned on the event  $\mathcal{E}_0(r_0) \cap \mathcal{E}_*(\bar{r}_*) \cap \mathcal{E}_*(\tilde{r}_*) \cap \mathcal{E}_{\text{loc}} \cap \left\{ \cap_{s=0}^{S-1} \mathcal{F}(r_{s-1}) \right\}$ ,  $\hat{\beta}^{(S)}$  satisfies the bounds

$$\left\| \hat{\beta}^{(S)} - \beta_{\tau} \right\|_{\Sigma} \leq \bar{\kappa}^{-1}\vartheta(\gamma) \cdot r_{S-1} + \bar{\kappa}^{-1}r_* = r_S \leq r_{S-1}. \quad (47)$$

Since  $r_s = \{\bar{\kappa}^{-1}\vartheta(\gamma)\}^s r_0 + [1 - \{\bar{\kappa}^{-1}\vartheta(\gamma)\}^s] / [1 - \bar{\kappa}^{-1}\vartheta(\gamma)] \bar{\kappa}^{-1}r_*$  for  $s = 1, \dots, S$ . Then  $S = \lceil \log(r_0/r_*) / \log(\bar{\kappa}/\vartheta(\gamma)) \rceil + 1$  is the smallest integer such that  $\{\bar{\kappa}^{-1}\vartheta(\gamma)\}^{S-1}r_0 \leq r_*$ .

Finally, together with (43) and (45)–(47), conditioned on the event  $\mathcal{E}_0(r_0) \cap \mathcal{E}_*(\bar{r}_*) \cap \mathcal{E}_*(\tilde{r}_*)$ ,

$$\left\| \hat{\beta}^{(S)} - \beta_{\tau} \right\|_{\Sigma} \leq \bar{\kappa}^{-1}\vartheta(\gamma) \cdot r_* + \frac{1}{\bar{\kappa} - \vartheta(\gamma)} r_* \lesssim r_*$$

holds with probability at least  $1 - (2S + 1)e^{-\gamma} - S\varepsilon$ . This completes the proof.  $\blacksquare$

### 3.3 Proof of Theorem 3

**Theorem 3** (Restatement of Theorem 3 from main text). *Assume that Conditions (A1)–(A7) hold, and  $r_0, \lambda_* > 0$ . For any  $\gamma, \varepsilon > 0$ , there exists a constant  $C_{\varepsilon} > 0$  such that the bandwidths  $h_l \geq h > 0$  and the regularization parameter  $\lambda = 2.5(\lambda_* + \varsigma) > 0$  satisfy  $d^{1/2}\lambda \lesssim h_l \lesssim 1$ , and*

$$\varsigma \asymp \max \left\{ \frac{r_0}{h} \sqrt{\frac{d(\log p + \gamma)}{M}}, d^{-1/2} \left( \sqrt{\frac{p + \gamma}{m}} + \frac{C_{\varepsilon}}{h_l} \sqrt{\frac{p^3}{M}} + h_l + 1 - L^{-1} \right) r_0 + d^{-1/2} h^2 \right\}.$$

*Then, conditioned on the event  $\mathcal{E}_0(r_0) \cap \mathcal{E}_*(\bar{\lambda}_*) \cap \mathcal{E}_*(\tilde{\lambda}_*)$ , there exists a constant  $M_0 > 0$  such that for all  $M \geq M_0$ , the one-step regularized estimator computed on the  $l$ -th machine satisfies  $\tilde{\beta}_l^{(1)} \in \mathbb{C}_{\Sigma}(d)$ , and with probability at least  $1 - 3e^{-\gamma} - \varepsilon$ ,*

$$\left\| \tilde{\beta}_l^{(1)} - \beta_{\tau} \right\|_{\Sigma} \lesssim C \left( \frac{d}{h} \sqrt{\frac{\log p + \gamma}{M}} + \sqrt{\frac{p + \gamma}{m}} + \frac{C_{\varepsilon}}{h_l} \sqrt{\frac{p^3}{M}} + h_l + 1 - L^{-1} \right) r_0 + d^{1/2} \lambda_* + h^2,$$

*where  $C > 0$  is a constant depending on  $(\tau, n_u, f_u, \kappa_u, \mu_3, a_1, B, \xi_p, \xi_{\min})$ .*

*Proof.* Denote  $\tilde{\beta} = \tilde{\beta}_l^{(1)}$  and  $\tilde{\zeta} = \tilde{\beta} - \beta_{\tau}$ . Based on the first-order optimality condition, there exists a subgradient  $\tilde{\mathbf{g}} \in \partial \|\tilde{\beta}\|_1$  such that  $\nabla \tilde{\mathcal{L}}_{M,l}^{(0)}(\tilde{\beta}) + \lambda \cdot \tilde{\mathbf{g}} = \mathbf{0}$  and  $\tilde{\mathbf{g}}^T \tilde{\beta} = \|\tilde{\beta}\|_1$ . Therefore,

$$\langle \tilde{\mathbf{g}}, \beta_{\tau} - \tilde{\beta} \rangle \leq \|\beta_{\tau}\|_1 - \|\tilde{\beta}\|_1 = \|\beta_{\tau, \mathcal{A}}\|_1 - \|\tilde{\zeta}_{\mathcal{A}^c}\|_1 - \|\tilde{\zeta}_{\mathcal{A}} + \beta_{\tau, \mathcal{A}}\|_1 \leq \|\tilde{\zeta}_{\mathcal{A}}\|_1 - \|\tilde{\zeta}_{\mathcal{A}^c}\|_1.$$

This implies that

$$\begin{aligned} 0 &\leq \bar{D}_{\tilde{\mathcal{L}}_{M,l}}^{(0)}(\tilde{\beta}, \beta_{\tau}) = \left\langle \nabla \tilde{\mathcal{L}}_{M,l}^{(0)}(\tilde{\beta}) - \nabla \tilde{\mathcal{L}}_{M,l}^{(0)}(\beta_{\tau}), \tilde{\beta} - \beta_{\tau} \right\rangle \\ &= \lambda \cdot \langle \tilde{\mathbf{g}}, \beta_{\tau} - \tilde{\beta} \rangle - \langle \nabla \tilde{\mathcal{L}}_{M,l}^{(0)}(\beta_{\tau}), \tilde{\zeta} \rangle \\ &\leq \lambda \cdot (\|\tilde{\zeta}_{\mathcal{A}}\|_1 - \|\tilde{\zeta}_{\mathcal{A}^c}\|_1) - \langle \nabla \tilde{\mathcal{L}}_{M,l}^{(0)}(\beta_{\tau}), \tilde{\zeta} \rangle, \end{aligned} \quad (48)$$

where  $\nabla \tilde{\mathcal{L}}_{M,l}^{(0)}(\beta_\tau) = \nabla \mathcal{L}_{m,l}^{(0)}(\beta_\tau) - \nabla \mathcal{L}_{m,l}^{(0)}(\tilde{\beta}^{(0)}) + \nabla \mathcal{L}_M^{(0)}(\tilde{\beta}^{(0)})$ . Decompose  $\nabla \tilde{\mathcal{L}}_{M,l}^{(0)}(\beta_\tau)$  as

$$\begin{aligned} & \nabla \tilde{\mathcal{L}}_{M,l}^{(0)}(\beta_\tau) \\ &= \hat{\mathbf{U}}_M(\tilde{\beta}^{(0)}) - \hat{\mathbf{D}}_{m,l}(\tilde{\beta}^{(0)})(\tilde{\beta}^{(0)} - \beta_\tau) \\ &= \left\{ \hat{\mathbf{U}}_M(\tilde{\beta}^{(0)}) - \mathbf{U}_M(\tilde{\beta}^{(0)}) \right\} + \left\{ \wp_M(\tilde{\beta}^{(0)}) - \mathfrak{S}_M(\tilde{\beta}^{(0)}) \right\} \\ &+ \left\{ \mathbf{U}_M(\beta_\tau) - \mathbf{J}_M(\beta_\tau) \right\} + \mathbf{J}_M(\beta_\tau) + \left\{ \mathbf{J}_M(\tilde{\beta}^{(0)}) - \mathbf{J}_M(\beta_\tau) - \mathbf{H}_M(\beta_\tau)(\tilde{\beta}^{(0)} - \beta_\tau) \right\} \\ &+ \left\{ \mathbf{H}_M(\beta_\tau) - \mathbf{H}_M(\tilde{\beta}^{(0)}) \right\}(\tilde{\beta}^{(0)} - \beta_\tau) + \left\{ \mathbf{H}_M(\tilde{\beta}^{(0)}) - \mathbf{H}_{m,l}(\tilde{\beta}^{(0)}) \right\}(\tilde{\beta}^{(0)} - \beta_\tau) \\ &+ \left\{ \mathbf{H}_{m,l}(\tilde{\beta}^{(0)}) - \mathbf{D}_{m,l}(\tilde{\beta}^{(0)}) \right\}(\tilde{\beta}^{(0)} - \beta_\tau) + \left\{ \mathbf{D}_{m,l}(\tilde{\beta}^{(0)}) - \hat{\mathbf{D}}_{m,l}(\tilde{\beta}^{(0)}) \right\}(\tilde{\beta}^{(0)} - \beta_\tau). \end{aligned}$$

For  $r > 0$ , define

$$\begin{aligned} \mathfrak{J}_M(r) &= \sup_{\beta \in \mathbb{B}_\Sigma(r)} \|E[\Delta_M(\beta)]\|_2, & \mathfrak{H}_M(r) &= \sup_{\beta \in \mathbb{B}_\Sigma(r)} \|\mathfrak{F}_M(\beta)\|_2, \\ \mathfrak{H}_{M,l}(r) &= \sup_{\beta \in \mathbb{B}_\Sigma(r)} \|\mathfrak{F}_{M,l}(\beta)\|_2, & \mathfrak{G}_{m,l}(r) &= \sup_{\beta \in \mathbb{B}_\Sigma(r)} \|\mathfrak{H}_{m,l}(\beta)\|_2, \\ \mathfrak{D}_{m,l}(r) &= \sup_{\beta \in \mathbb{B}_\Sigma(r)} \|\mathfrak{E}_{m,l}(\beta)\|_2. \end{aligned}$$

Based on the Hölder's inequality, under the condition of the event  $\mathcal{E}_*(\bar{\lambda}_*) \cap \mathcal{E}_*(\tilde{\lambda}_*) \cap \mathcal{E}_0(r_0)$ ,

$$\begin{aligned} \left| \langle \nabla \tilde{\mathcal{L}}_{M,l}^{(0)}(\beta_\tau), \tilde{\zeta} \rangle \right| &\leq \{ \Xi_M(r_0) + \lambda_* \} \cdot \|\tilde{\zeta}\|_1 \\ &+ \{ \mathfrak{J}_M(r_0) + \omega_M^* + \mathfrak{H}_M(r_0) + \mathfrak{H}_{M,l}(r_0) \\ &+ \mathfrak{G}_{m,l}(r_0) + \mathfrak{D}_{m,l}(r_0) \} \cdot \|\tilde{\zeta}\|_\Sigma. \end{aligned} \quad (49)$$

Take  $\lambda = 2.5 (\lambda_* + \varsigma)$  with  $\varsigma$  satisfying

$$\varsigma \geq \max \left\{ \Xi_M(r_0), [\mathfrak{J}_M(r_0) + \omega_M^* + \mathfrak{H}_M(r_0) + \mathfrak{H}_{M,l}(r_0) + \mathfrak{G}_{m,l}(r_0) + \mathfrak{D}_{m,l}(r_0)] d^{-1/2} \right\}, \quad (50)$$

so that

$$\begin{aligned} \Xi_M(r_0) + \lambda_* &\leq 0.4 \lambda, \\ \mathfrak{J}_M(r_0) + \omega_M^* + \mathfrak{H}_M(r_0) + \mathfrak{H}_{M,l}(r_0) + \mathfrak{G}_{m,l}(r_0) + \mathfrak{D}_{m,l}(r_0) &\leq 0.4 d^{1/2} \lambda. \end{aligned} \quad (51)$$

Together with (48), (49), and (51), we have

$$0 \leq 1.4 \|\tilde{\zeta}_{\mathcal{A}}\|_1 - 0.6 \|\tilde{\zeta}_{\mathcal{A}^c}\|_1 + 0.4 d^{1/2} \|\tilde{\zeta}\|_\Sigma.$$

Therefore,

$$\|\tilde{\zeta}\|_1 \leq \frac{10}{3} \|\tilde{\zeta}_{\mathcal{A}}\|_1 + \frac{2}{3} d^{1/2} \|\tilde{\zeta}\|_\Sigma \leq 4 d^{1/2} \|\tilde{\zeta}\|_\Sigma.$$

This implies that  $\tilde{\beta} \in \mathbb{C}_\Sigma(d)$ .

Assume the event  $\mathcal{E}_*(\bar{\lambda}_*) \cap \mathcal{E}_*(\tilde{\lambda}_*) \cap \mathcal{E}_0(\lambda_0)$  occurs. Define  $\tilde{\beta}_v = \beta_\tau + v(\tilde{\beta} - \beta_\tau)$  with  $0 < v \leq 1$ . For  $r_{\text{loc}} = h_l/(4\iota_{0.25})$ , we have  $\tilde{\beta}_v \in \mathbb{B}_\Sigma(r_{\text{loc}}) \cap \mathbb{C}_\Sigma(d)$  under the requirement (50) on  $\varsigma$ . Based on (48), we have

$$\begin{aligned} \bar{D}_{\tilde{\mathcal{L}}_{M,l}}^{(0)}(\tilde{\beta}_v, \beta_\tau) &\leq v \cdot \bar{D}_{\tilde{\mathcal{L}}_{M,l}}^{(0)}(\tilde{\beta}, \beta_\tau) \leq v \left( 1.4 \lambda \|\tilde{\zeta}_{\mathcal{A}}\|_1 + 0.4 d^{1/2} \lambda \|\tilde{\zeta}\|_\Sigma \right) \\ &\leq 1.8 d^{1/2} \lambda \|\tilde{\beta}_v - \beta_\tau\|_\Sigma. \end{aligned}$$

From Lemma 9, as long as  $(d \log p + \gamma)/m \lesssim h_l \lesssim 1$ ,

$$\bar{D}_{\tilde{\mathcal{L}}_{M,l}}^{(0)}(\tilde{\beta}_v, \beta_\tau) \geq 0.5\kappa_* n_l f_{l,l} C_m^{-1} \|\tilde{\beta}_v - \beta_\tau\|_\Sigma^2$$

holds with probability at least  $1 - e^{-\gamma}$ . Therefore,

$$\|\tilde{\beta}_v - \beta_\tau\|_\Sigma \leq 3.6C_m(\kappa_* n_l f_{l,l})^{-1} d^{1/2} \lambda. \quad (52)$$

At follows, we choose a sufficiently large  $\lambda$  (or  $\varsigma$ ) satisfying (50).

According to Lemma 10,

$$\Xi_M(r_0) \lesssim \frac{r_0}{h} \sqrt{\frac{d(\log p + \gamma)}{M}}$$

holds with probability at least  $1 - e^{-\gamma}$ . Based on Lemmas 3–8, as long as  $r_0 \lesssim h_l$  and  $h_l \geq h$ ,

$$\begin{aligned} & \mathfrak{I}_M(r_0) + \omega_M^* + \mathfrak{H}_M(r_0) + \mathfrak{H}_{M,l}(r_0) + \mathfrak{G}_{m,l}(r_0) + \mathfrak{D}_{m,l}(r_0) \\ & \lesssim C_1 r_0^2 + C_2 h^2 + C_3 r_0^2 + [C_4(1 - L^{-1}) + C_5|h_l - h|] r_0 \\ & \quad + C_6 r_0 \sqrt{\frac{p + \gamma}{m}} + C_7 r_0 \frac{C_\varepsilon}{h_l} \sqrt{\frac{p^3}{M}} \\ & \lesssim C \left( \sqrt{\frac{p + \gamma}{m}} + \frac{C_\varepsilon}{h_l} \sqrt{\frac{p^3}{M}} + h_l + 1 - L^{-1} \right) r_0 + C' h^2 \end{aligned}$$

holds with probability at least  $1 - e^{-\gamma} - \varepsilon$  (for some constants  $C, C' > 0$ ). Therefore, after choosing a sufficiently large  $\varsigma$ , which is of the order

$$\varsigma \asymp \max \left\{ \frac{r_0}{h} \sqrt{\frac{d(\log p + \gamma)}{M}}, d^{-1/2} \left( \sqrt{\frac{p + \gamma}{m}} + \frac{C_\varepsilon}{h_l} \sqrt{\frac{p^3}{M}} + h_l + 1 - L^{-1} \right) r_0 + d^{-1/2} h^2 \right\},$$

(50) holds with high probability. Then, conditioned on the event  $\mathcal{E}_*(\bar{\lambda}_*) \cap \mathcal{E}_*(\tilde{\lambda}_*) \cap \mathcal{E}_0(\lambda_0)$ ,  $\tilde{\beta}_v$  satisfies (52) with probability at least  $1 - 3e^{-\gamma} - \varepsilon$ . Based on the above choice of  $\varsigma$ , the right-hand side of (52) is strictly less than  $r_{\text{loc}}$  provided that  $h_l > 14.4\iota_{0.25}(\kappa_* n_l f_{l,l})^{-1} C_m d^{1/2} \lambda$ . This implies that  $\tilde{\beta} = \tilde{\beta}_v \in \mathbb{B}_\Sigma(r_{\text{loc}})$ ; and  $\tilde{\beta}$  satisfies the bound (52).  $\blacksquare$

### 3.4 Proof of Theorem 4

**Theorem 4** (Restatement of Theorem 4 from main text). *Assume the Conditions in Theorem 3 hold. For any  $\gamma, \varepsilon > 0$  and a constant  $C_\varepsilon > 0$ , choose the local and global bandwidths as  $h_l \asymp (C_\varepsilon^2 p^3 / M)^{1/4}$  and  $h \asymp \{d(\log p + \gamma)/M\}^{1/4}$ . For  $r_0, \lambda_* > 0$ , let  $r_* = d^{1/2} \lambda_*$  and  $\lambda_s = 2.5(\lambda_* + \varsigma_s) > 0$  for  $s \geq 2$  with*

$$\varsigma_s \asymp \max \left\{ \vartheta^s d^{-1/2} r_0 + \vartheta d^{-1/2} (r_* + h^2), \sqrt{\frac{\log p + \gamma}{M}} \right\},$$

where  $\vartheta \asymp C \max \{d^3(\log p + \gamma)/M, C_\varepsilon^2 p^3 / M\}^{1/4} + \sqrt{(p + \gamma)/m} + 1 - L^{-1}$ . Assume  $m \gtrsim p + \gamma$ ,  $M \gtrsim \max \{d^3(\log p + \gamma), C_\varepsilon^2 p^3\}$ ,  $r_0 \lesssim \min \{1, (C_\varepsilon^2 p^3 / M)^{1/4}\}$ , and  $r_* \lesssim h_l \lesssim 1$ .

Then, conditioned on the event  $\mathcal{E}_0(r_0) \cap \mathcal{E}_*(\bar{\lambda}_*) \cap \mathcal{E}_*(\tilde{\lambda}_*)$ , there exist a constant  $M_0 > 0$  such that for all  $M \geq M_0$ , the  $S$ -step regularized estimator  $\tilde{\beta}_l^{(S)}$  computed on the  $l$ -th machine satisfies

$$\|\tilde{\beta}_l^{(S)} - \beta_\tau\|_\Sigma \lesssim d^{1/2}\lambda_* + h^2 \quad \text{and} \quad \|\tilde{\beta}_l^{(S)} - \beta_\tau\|_1 \lesssim d\lambda_* + d^{1/2}h^2$$

with probability at least  $1 - 3Se^{-\gamma} - S\varepsilon$ , provided that the number of iterations satisfies  $S \gtrsim \log(r_0/r_*)/\log(1/\vartheta)$ .

*Proof.* We carry out the whole proof under the condition of the event  $\mathcal{E}_0(\lambda_0) \cap \mathcal{E}_*(\bar{\lambda}_*) \cap \mathcal{E}_*(\tilde{\lambda}_*)$  for some prespecified  $r_0, \lambda_* > 0$ ; and write  $r_* = d^{1/2}\lambda_*$ . Recall that in the proof of Theorem 3, the regularization parameter  $\lambda_1$  needs to be sufficiently large to obtain the desired error bound for the first iterate  $\tilde{\beta}^{(1)} = \tilde{\beta}_l^{(1)}$  on the  $l$ th machine. Given  $\gamma > 0$ , let  $\lambda_1 = 2.5(\lambda_* + \varsigma_1)$ , where  $\varsigma_1 > 0$  is of the order

$$\varsigma_1 \asymp \max \left\{ \frac{r_0}{h} \sqrt{\frac{d(\log p + \gamma)}{M}}, d^{-1/2} \left( \sqrt{\frac{p + \gamma}{m}} + \frac{C_\varepsilon}{h_l} \sqrt{\frac{p^3}{M}} + h_l + 1 - L^{-1} \right) r_0 + d^{-1/2}h^2 \right\}.$$

As long as the bandwidth  $h_l \gtrsim \max(r_0, r_*) > 0$  satisfy

$$r_* + \max \left\{ \frac{dr_0}{h} \sqrt{\frac{\log p + \gamma}{M}}, \left( \sqrt{\frac{p + \gamma}{m}} + \frac{C_\varepsilon}{h_l} \sqrt{\frac{p^3}{M}} + h_l + 1 - L^{-1} \right) r_0 + h^2 \right\} \lesssim h_l \lesssim 1,$$

the first iterate  $\tilde{\beta}^{(1)}$  satisfies  $\tilde{\beta}^{(1)} \in \mathbb{C}_\Sigma(d)$ ; and with probability at least  $1 - 2e^{-\gamma} - \varepsilon$ ,

$$\begin{aligned} \|\tilde{\beta}^{(1)} - \beta_\tau\|_\Sigma &\leq C \left( \frac{d}{h} \sqrt{\frac{\log p + \gamma}{M}} + \sqrt{\frac{p + \gamma}{m}} + \frac{C_\varepsilon}{h_l} \sqrt{\frac{p^3}{M}} + h_l + 1 - L^{-1} \right) r_0 \\ &\quad + C'(r_* + h^2) = r_1. \end{aligned}$$

Let

$$\begin{aligned} \vartheta &= \vartheta(d, p, m, M, L, h_l, h, \gamma, C_\varepsilon) \\ &= C \left\{ \frac{d}{h} \sqrt{\frac{\log p + \gamma}{M}} + \sqrt{\frac{p + \gamma}{m}} + \frac{C_\varepsilon}{h_l} \sqrt{\frac{p^3}{M}} + h_l + 1 - L \right\} \end{aligned}$$

be the contraction factor. After setting  $h_l \asymp (C_\varepsilon^2 p^3/M)^{1/4}$  and  $h \asymp \{d(\log p + \gamma)/M\}^{1/4}$ , we have

$$\vartheta \asymp C \left\{ d^{3/4} \left( \frac{\log p + \gamma}{M} \right)^{1/4} + \left( \frac{C_\varepsilon^2 p^3}{M} \right)^{1/4} + \sqrt{\frac{p + \gamma}{m}} + 1 - L \right\}$$

and

$$\varsigma_1 \asymp \max \left\{ \vartheta d^{-1/2}r_0, \sqrt{\frac{\log p + \gamma}{M}} \right\}.$$

Therefore, if  $r_0 \lesssim \min\{1, (C_\varepsilon^2 p^3/M)^{1/4}\}$ ,  $d^{1/2}\varsigma_1 \lesssim h_l$ . To ensure the contraction factor  $\vartheta$  strictly less than 1, we need  $m \gtrsim p + \gamma$  and  $M \gtrsim \max\{d^3(\log p + \gamma), C_\varepsilon^2 p^3\}$ . Then, the one-step estimator reduces the estimation error of  $\tilde{\beta}^{(0)}$  by a factor of  $\vartheta$ .

For  $s \geq 2$ , define the events  $\mathcal{E}_s(r_s) := \{\tilde{\beta}^{(s)} \in \mathbb{B}_{\Sigma}(r_s) \cap \mathbb{C}_{\Sigma}(d)\}$ , where

$$r_s := \vartheta r_{s-1} + C'(r_* + h^2) = \vartheta^s r_0 + C' \frac{1 - \vartheta^s}{1 - \vartheta} (r_* + h^2). \quad (53)$$

Set  $\lambda_s = 3 \varsigma_s$  at iteration  $s \geq 2$  with

$$\varsigma_s \asymp \max \left\{ \vartheta d^{-1/2} r_{s-1}, \sqrt{\frac{\log p + \gamma}{M}} \right\}. \quad (54)$$

Then, based on (53) and (54), for  $s \geq 2$ ,

$$\varsigma_s \asymp \max \left\{ \vartheta^s d^{-1/2} r_0 + \vartheta d^{-1/2} (r_* + h^2), \sqrt{\frac{\log p + \gamma}{M}} \right\}.$$

Note that under the conditions on  $r_0$  and  $(m, M)$ ,  $d^{1/2} \varsigma_s \lesssim h_l$  for  $s \geq 2$ . According to Theorem 3, conditioned on the event  $\mathcal{E}_{s-1}(r_{s-1}) \cap \mathcal{E}_*(\bar{\lambda}_*) \cap \mathcal{E}_*(\tilde{\lambda}_*)$ , the  $s$ -step iterate  $\tilde{\beta}^{(s)}$  satisfies  $\tilde{\beta}^{(s)} \in \mathbb{C}_{\Sigma}(d)$ ; and with probability at least  $1 - 3e^{-\gamma} - \varepsilon$ ,

$$\|\tilde{\beta}^{(s)} - \beta_{\tau}\|_{\Sigma} \leq \vartheta r_{s-1} + C'(r_* + h^2) = r_s = \vartheta^s r_0 + C' \frac{1 - \vartheta^s}{1 - \vartheta} (r_* + h^2).$$

Let  $S = \lceil \log(r_0/r_*) / \log(1/\vartheta) \rceil$  be the smallest integer such that  $\vartheta^S r_0 \leq r_*$ . Under the condition  $\mathcal{E}_0(\lambda_0) \cap \mathcal{E}_*(\bar{\lambda}_*) \cap \mathcal{E}_*(\tilde{\lambda}_*)$ , the  $S$ th iterate  $\tilde{\beta}^{(S)}$  satisfies the error bounds

$$\|\tilde{\beta}^{(S)} - \beta_{\tau}\|_{\Sigma} \lesssim d^{1/2} \lambda^* + h^2 \quad \text{and} \quad \|\tilde{\beta}^{(S)} - \beta_{\tau}\|_1 \lesssim d \lambda^* + d^{1/2} h^2$$

with probability at least  $1 - 3Se^{-\gamma} - S\varepsilon$  based on the union bound over  $s = 1, 2, \dots, S$ . This completes the proof of the theorem.  $\blacksquare$

## References

- [1] S. Boucheron, G. Lugosi, and P. Massart. *Concentration Inequalities: A Nonasymptotic Theory of Independence*. Oxford Univ. Press, 2013.
- [2] O. Bousquet. Concentration inequalities for sub-additive functions using the entropy method. *In Stochastic Inequalities and Applications. Progress in Probability*, volume 56, pages 213–247, Birkhäuser, Basel, 2003.
- [3] Jianqing Fan, Han Liu, Qiang Sun, and Tong Zhang. I-LAMM for sparse learning: Simultaneous control of algorithmic complexity and statistical error. *The Annals of Statistics*, 46(2):814–841, 2018.
- [4] Xuming He, Xiaou Pan, Kean Ming Tan, and Wen-Xin Zhou. Smoothed quantile regression with large-scale inference. *Journal of Econometrics*, 232(2):367–388, 2023.
- [5] M. Ledoux and M. Talagrand. *Probability in Banach Spaces: Isoperimetry and Processes*. Springer-Verlag, 1991.

- [6] Yanan Song, Haohui Han, Liya Fu, and Ting Wang. Penalized weighted smoothed quantile regression for high-dimensional longitudinal data. *Statistics in Medicine*, 43(10):2007–2042, 2024.
- [7] V. Spokoiny. Parametric estimation. Finite sample theory. *The Annals of Statistics*, 40:2877–2909, 2012.
- [8] V. Spokoiny. Bernstein-von mises theorem for growing parameter dimension. *Available at arXiv:1302.3430*, 2013.
